# Supplementary material for: Drivers of spatio-temporal variation in mosquito submissions to the citizen science project ‘Mückenatlas’
Source: Sci Rep. 2021 Jan 14;11:1356. doi: 10.1038/s41598-020-80365-3 (PMC7809264; doi:10.1038/s41598-020-80365-3)
Supplement: Supplementary file 1 — Supplementary Information. [file 41598_2020_80365_MOESM1_ESM.pdf]

## Supplementary Information

### Drivers of spatio-temporal variation in mosquito submissions to the citizen science project 'Mückenatlas'

Nadja Pernat<sup>\*1,3,5</sup>, Helge Kampen<sup>2</sup>, Florian Ruland<sup>3,4,5</sup>, Jonathan M. Jeschke<sup>3,4,5</sup>, Doreen Werner<sup>1,5</sup>

<sup>1</sup> Leibniz Centre for Agricultural Landscape Research, Eberswalder Str. 84, 15374 Müncheberg, Germany

<sup>2</sup> Friedrich-Loeffler-Institut, Federal Research Institute for Animal Health, Südufer 10, 17493 Greifswald – Insel Riems, Germany

<sup>3</sup> Freie Universität Berlin, Department of Biology, Chemistry, Pharmacy, Institute of Biology, Königin-Luise-Str. 1-3, 14195 Berlin, Germany

<sup>4</sup> Leibniz-Institute of Freshwater Ecology and Inland Fisheries (IGB), Müggelseedamm 310, 12587 Berlin, Germany

<sup>5</sup> Berlin-Brandenburg Institute of Advanced Biodiversity Research (BBIB), Königin-Luise-Str. 2-4, 14195 Berlin, Germany

\*Corresponding author: Nadja Pernat, Leibniz Centre for Agricultural Landscape Research, Eberswalder Str. 84, 15374 Muencheberg, Germany. Email: [nadja.pernat@zalf.de](mailto:nadja.pernat@zalf.de)

**Supplementary Table S1:** Covariates (i) automatically exported by the CULBASE database and (ii) manually created for this study (these are highlighted in grey).

| Variables                               | Explanation                                                                                                                                                                                                                                                                                                                                                                                            |
|-----------------------------------------|--------------------------------------------------------------------------------------------------------------------------------------------------------------------------------------------------------------------------------------------------------------------------------------------------------------------------------------------------------------------------------------------------------|
| Identification (Id)                     | Identification number                                                                                                                                                                                                                                                                                                                                                                                  |
| Species code (specc)                    | Internal hierarchical key for species, numeric                                                                                                                                                                                                                                                                                                                                                         |
| Species name original (spec.o)          | Species or - in not determinable cases - genus name, character                                                                                                                                                                                                                                                                                                                                         |
| Species name adapted (specn)            | Species names only, genus set to NA, character                                                                                                                                                                                                                                                                                                                                                         |
| Geo-reference (xvalue)                  | Geographical latitude, decimal in WSG1984                                                                                                                                                                                                                                                                                                                                                              |
| Geo-reference (yvalue)                  | Geographical longitude, decimal in WSG1984                                                                                                                                                                                                                                                                                                                                                             |
| Village name (villn)                    | Nearest village of catch location, character                                                                                                                                                                                                                                                                                                                                                           |
| Corine Landcover Category code (coverc) | Corine Land Cover Category (level 3), numeric                                                                                                                                                                                                                                                                                                                                                          |
| Corine Landcover Category name (covern) | Corine Land Cover Category (level 3), character                                                                                                                                                                                                                                                                                                                                                        |
| County name (countyn)                   | Federal state name in English, character                                                                                                                                                                                                                                                                                                                                                               |
| County code (countyc)                   | Federal state by numbers 1 to 16, numeric                                                                                                                                                                                                                                                                                                                                                              |
| Municipality name (munin)               | Municipality name of nearest village, character                                                                                                                                                                                                                                                                                                                                                        |
| Date (catchdate)                        | Date of catch, YYYY-MM-DD                                                                                                                                                                                                                                                                                                                                                                              |
| Biotope original (bio.o)                | Participant notion about find spot, character                                                                                                                                                                                                                                                                                                                                                          |
| Biotope category (biocat)               | Participant notion about find spot categorised (agricultural area, artificial vegetated area, captive breeding, cemetery, coastal wetland, farmstead/stable, forest, home indoors, home outdoors, industrial area, inland water, inland wetland, intersection home indoor/outdoor, mineral extraction site, overwintering ground, public building, transport area, transport vehicle, trap), character |

**Supplementary Figure S1:** Raster maps of the non-factor predictors considered (5 x 5 km<sup>2</sup> grid across Germany)

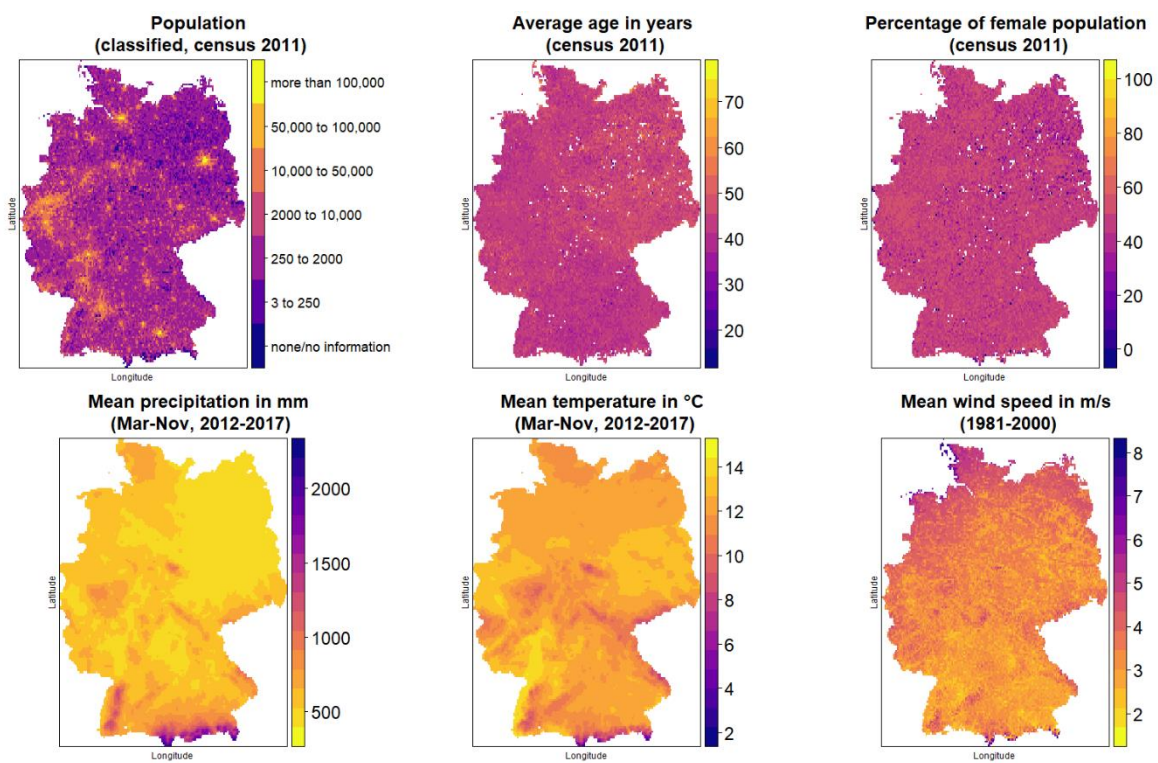

**Supplementary Figure S2:** Raster grid of Germany (5 x 5 km<sup>2</sup> cell size) showing per-capita rates of submissions from biotope category ‘home’ (white grid cells = zero submission and zero/invalid population data). Federal states of Germany (SH = Schleswig-Holstein, HH = Hamburg, HB = Bremen, NI = Lower Saxony, NW = North Rhine-Westphalia, HE = Hesse, RP = Rhineland Palatinate, SL = Saarland, BW = Baden-Wuerttemberg, BY = Bavaria, MV = Mecklenburg Western-Pomerania, BB = Brandenburg, BE = Berlin, ST = Saxony-Anhalt, SN = Saxony, TH = Thuringia). Raster map was created in R version 3.5.2., the German map outlining the federal states was drawn using QGIS version 3.4.2. (Quantum GIS Geographic Information System, Open Source Geospatial Foundation Project. <http://www.qgis.org/en/site/>).

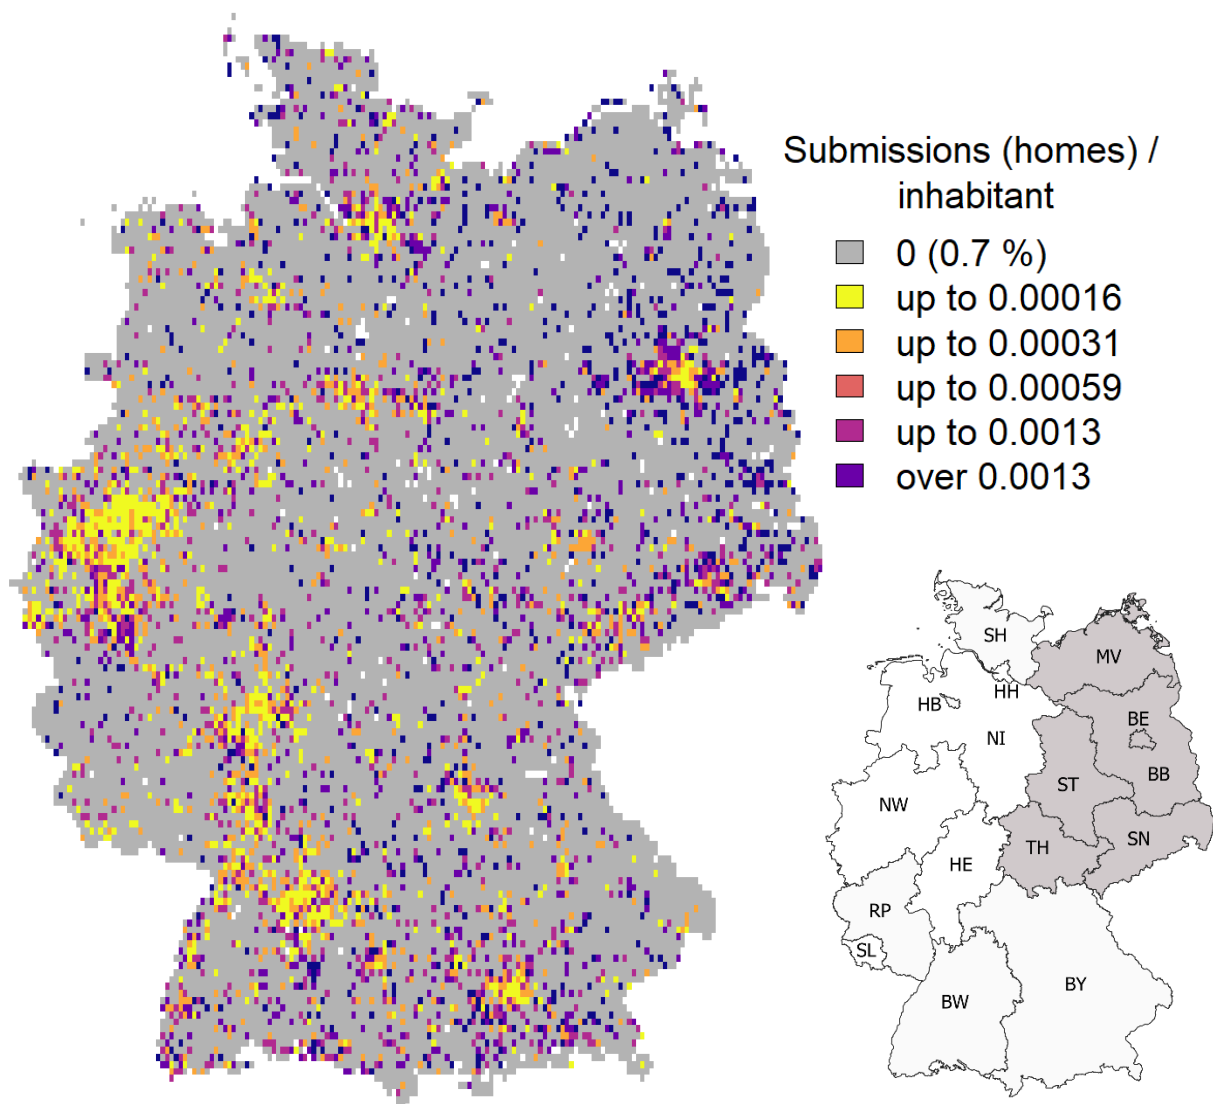

Supplementary Table S2: Complete output of Automated Model Selection (AMS)

|      | count_interc | count_east | count_fem  | count_pop | count_preci | count_water | count_wind  | zero_intercep | zero_east  | zero_fem   | zero_pop   | zero_preci | zero_water | zero_wind   | df | logLik      | AICc       | delta      | weight               |
|------|--------------|------------|------------|-----------|-------------|-------------|-------------|---------------|------------|------------|------------|------------|------------|-------------|----|-------------|------------|------------|----------------------|
| 3582 | -0,06671637  | 0,57575795 | NA         | 4,34E-05  | -0,00071955 | 0,41051829  | -0,17478186 | -2,59012234   | 0,38593256 | 0,02081194 | 0,00021148 | NA         | 0,47514204 | -0,138389   | 13 | -18905,1983 | 37836,4167 | 0          | 0.327803950016256    |
| 3584 | -0,47166397  | 0,58945108 | 0,00876766 | 4,25E-05  | -0,00073797 | 0,4135805   | -0,1717464  | -2,59012234   | 0,38593256 | 0,02081194 | 0,00021148 | NA         | 0,47514204 | -0,138389   | 14 | -18904,2241 | 37836,4714 | 0,05472222 | 0.318956459982774    |
| 4094 | -0,06671637  | 0,57575795 | NA         | 4,34E-05  | -0,00071955 | 0,41051829  | -0,17478186 | -2,66976045   | 0,40191971 | 0,02073197 | 0,0002118  | 0,00011864 | 0,47565984 | -0,13600353 | 14 | -18904,8563 | 37837,7358 | 1,31909727 | 0.169502399257558    |
| 4096 | -0,47166397  | 0,58945108 | 0,00876766 | 4,25E-05  | -0,00073797 | 0,4135805   | -0,1717464  | -2,66976045   | 0,40191971 | 0,02073197 | 0,0002118  | 0,00011864 | 0,47565984 | -0,13600353 | 15 | -18903,8821 | 37837,7908 | 1,37404122 | 0.164909214144916    |
| 3574 | -0,67953035  | 0,68234123 | NA         | 4,46E-05  | NA          | 0,41541375  | -0,13795142 | -2,59012234   | 0,38593256 | 0,02081194 | 0,00021148 | NA         | 0,47514204 | -0,138389   | 12 | -18910,3849 | 37844,7871 | 8,37034848 | 0.00498902988198517  |
| 3576 | -1,04079715  | 0,69637088 | 0,00755047 | 4,39E-05  | NA          | 0,41816409  | -0,13461471 | -2,59012234   | 0,38593256 | 0,02081194 | 0,00021148 | NA         | 0,47514204 | -0,138389   | 13 | -18909,6657 | 37845,3515 | 8,93473439 | 0.003762367900634    |
| 4086 | -0,67953035  | 0,68234123 | NA         | 4,46E-05  | NA          | 0,41541375  | -0,13795142 | -2,66976045   | 0,40191971 | 0,02073197 | 0,0002118  | 0,00011864 | 0,47565984 | -0,13600353 | 13 | -18910,0429 | 37846,1059 | 9,68922405 | 0.00258003687090344  |
| 4088 | -1,04079715  | 0,69637088 | 0,00755047 | 4,39E-05  | NA          | 0,41816409  | -0,13461471 | -2,66976045   | 0,40191971 | 0,02073197 | 0,0002118  | 0,00011864 | 0,47565984 | -0,13600353 | 14 | -18909,3237 | 37846,6706 | 10,2538317 | 0.00194546278656941  |
| 3552 | -1,28042467  | 0,61751101 | 0,00965662 | 4,55E-05  | -0,00054807 | 0,40424516  | NA          | -2,59012234   | 0,38593256 | 0,02081194 | 0,00021148 | NA         | 0,47514204 | -0,138389   | 13 | -18910,4703 | 37846,9608 | 10,544065  | 0.00168267234555645  |
| 3550 | -0,85074914  | 0,60334436 | NA         | 4,65E-05  | -0,00052401 | 0,40049867  | NA          | -2,59012234   | 0,38593256 | 0,02081194 | 0,00021148 | NA         | 0,47514204 | -0,138389   | 12 | -18911,6462 | 37847,3096 | 10,8928581 | 0.00141338380492759  |
| 4064 | -1,28042467  | 0,61751101 | 0,00965662 | 4,55E-05  | -0,00054807 | 0,40424516  | NA          | -2,66976045   | 0,40191971 | 0,02073197 | 0,0002118  | 0,00011864 | 0,47565984 | -0,13600353 | 14 | -18910,1283 | 37848,2799 | 11,8631623 | 0.000870084084471887 |
| 4062 | -0,85074914  | 0,60334436 | NA         | 4,65E-05  | -0,00052401 | 0,40049867  | NA          | -2,66976045   | 0,40191971 | 0,02073197 | 0,0002118  | 0,00011864 | 0,47565984 | -0,13600353 | 13 | -18911,3042 | 37848,6285 | 12,2117336 | 0.0007309201218895   |
| 3542 | -1,1987332   | 0,68175498 | NA         | 4,69E-05  | NA          | 0,40581671  | NA          | -2,59012234   | 0,38593256 | 0,02081194 | 0,00021148 | NA         | 0,47514204 | -0,138389   | 11 | -18914,56   | 37851,1347 | 14,7179593 | 0.000208761264435051 |
| 3544 | -1,59179834  | 0,69737855 | 0,00852736 | 4,60E-05  | NA          | 0,40932129  | NA          | -2,59012234   | 0,38593256 | 0,02081194 | 0,00021148 | NA         | 0,47514204 | -0,138389   | 12 | -18913,6436 | 37851,3045 | 14,8877722 | 0.000191767733508303 |
| 4054 | -1,1987332   | 0,68175498 | NA         | 4,69E-05  | NA          | 0,40581671  | NA          | -2,66976045   | 0,40191971 | 0,02073197 | 0,0002118  | 0,00011864 | 0,47565984 | -0,13600353 | 12 | -18914,218  | 37852,4533 | 16,0366133 | 0.000107971182499365 |
| 4056 | -1,59179834  | 0,69737855 | 0,00852736 | 4,60E-05  | NA          | 0,40932129  | NA          | -2,66976045   | 0,40191971 | 0,02073197 | 0,0002118  | 0,00011864 | 0,47565984 | -0,13600353 | 13 | -18913,3016 | 37852,6234 | 16,2066477 | 9,92E+09             |
| 1534 | -0,06671637  | 0,57575795 | NA         | 4,34E-05  | -0,00071955 | 0,41051829  | -0,17478186 | -3,07214819   | 0,38813022 | 0,02082345 | 0,00021556 | NA         | 0,44803127 | NA          | 12 | -18914,6523 | 37853,3218 | 16,9050863 | 6,99E+09             |
| 1536 | -0,47166397  | 0,58945108 | 0,00876766 | 4,25E-05  | -0,00073797 | 0,4135805   | -0,1717464  | -3,07214819   | 0,38813022 | 0,02082345 | 0,00021556 | NA         | 0,44803127 | NA          | 13 | -18913,6781 | 37853,3763 | 16,9595868 | 6,81E+09             |
| 2046 | -0,06671637  | 0,57575795 | NA         | 4,34E-05  | -0,00071955 | 0,41051829  | -0,17478186 | -3,17508673   | 0,41103069 | 0,02071909 | 0,00021591 | 0,0001702  | 0,4495725  | NA          | 13 | -18913,9374 | 37853,8949 | 17,478209  | 5,25E+09             |
| 2048 | -0,47166397  | 0,58945108 | 0,00876766 | 4,25E-05  | -0,00073797 | 0,4135805   | -0,1717464  | -3,17508673   | 0,41103069 | 0,02071909 | 0,00021591 | 0,0001702  | 0,4495725  | NA          | 14 | -18912,9632 | 37853,9497 | 17,5329312 | 5,11E+08             |
| 1526 | -0,67953035  | 0,68234123 | NA         | 4,46E-05  | NA          | 0,41541375  | -0,13795142 | -3,07214819   | 0,38813022 | 0,02082345 | 0,00021556 | NA         | 0,44803127 | NA          | 11 | -18919,8389 | 37861,6924 | 25,2756564 | 1,06E+08             |
| 1528 | -1,04079715  | 0,69637088 | 0,00755047 | 4,39E-05  | NA          | 0,41816409  | -0,13461471 | -3,07214819   | 0,38813022 | 0,02082345 | 0,00021556 | NA         | 0,44803127 | NA          | 12 | -18919,1196 | 37862,2565 | 25,8398207 | 8,03E+07             |
| 2038 | -0,67953035  | 0,68234123 | NA         | 4,46E-05  | NA          | 0,41541375  | -0,13795142 | -3,17508673   | 0,41103069 | 0,02071909 | 0,00021591 | 0,0001702  | 0,4495725  | NA          | 12 | -18919,124  | 37862,2653 | 25,8485575 | 7,99E+07             |
| 2040 | -1,04079715  | 0,69637088 | 0,00755047 | 4,39E-05  | NA          | 0,41816409  | -0,13461471 | -3,17508673   | 0,41103069 | 0,02071909 | 0,00021591 | 0,0001702  | 0,4495725  | NA          | 13 | -18918,4048 | 37862,8297 | 26,4129434 | 6,03E+07             |
| 1504 | -1,28042467  | 0,61751101 | 0,00965662 | 4,55E-05  | -0,00054807 | 0,40424516  | NA          | -3,07214819   | 0,38813022 | 0,02082345 | 0,00021556 | NA         | 0,44803127 | NA          | 12 | -18919,9243 | 37863,8659 | 27,4491513 | 3,59E+07             |
| 1502 | -0,85074914  | 0,60334436 | NA         | 4,65E-05  | -0,00052401 | 0,40049867  | NA          | -3,07214819   | 0,38813022 | 0,02082345 | 0,00021556 | NA         | 0,44803127 | NA          | 11 | -18921,1001 | 37864,2149 | 27,798166  | 3,02E+07             |
| 2016 | -1,28042467  | 0,61751101 | 0,00965662 | 4,55E-05  | -0,00054807 | 0,40424516  | NA          | -3,17508673   | 0,41103069 | 0,02071909 | 0,00021591 | 0,0001702  | 0,4495725  | NA          | 13 | -18919,2094 | 37864,439  | 28,022274  | 2,70E+06             |
| 2014 | -0,85074914  | 0,60334436 | NA         | 4,65E-05  | -0,00052401 | 0,40049867  | NA          | -3,17508673   | 0,41103069 | 0,02071909 | 0,00021591 | 0,0001702  | 0,4495725  | NA          | 12 | -18920,3853 | 37864,7878 | 28,3710671 | 2,26E+07             |
| 3454 | -0,06671637  | 0,57575795 | NA         | 4,34E-05  | -0,00071955 | 0,41051829  | -0,17478186 | -1,61349146   | 0,35721774 | NA         | 0,00021669 | NA         | 0,46315983 | -0,13737061 | 13 | -18921,8664 | 37867,75   | 31,3332937 | 5,15E+06             |
| 3456 | -0,47166397  | 0,58945108 | 0,00876766 | 4,25E-05  | -0,00073797 | 0,4135805   | -0,1717464  | -1,61349146   | 0,35721774 | NA         | 0,00021669 | NA         | 0,46315983 | -0,13737061 | 13 | -18920,8922 | 37867,8045 | 31,3877942 | 5,01E+05             |
| 1494 | -1,1987332   | 0,68175498 | NA         | 4,69E-05  | NA          | 0,40581671  | NA          | -3,07214819   | 0,38813022 | 0,02082345 | 0,00021556 | NA         | 0,44803127 | NA          | 10 | -18924,014  | 37868,0402 | 31,6234889 | 4,45E+06             |
| 1496 | -1,59179834  | 0,69737855 | 0,00852736 | 4,60E-05  | NA          | 0,40932129  | NA          | -3,07214819   | 0,38813022 | 0,02082345 | 0,00021556 | NA         | 0,44803127 | NA          | 11 | -18923,0976 | 37868,2098 | 31,7930801 | 4,09E+06             |
| 2006 | -1,1987332   | 0,68175498 | NA         | 4,69E-05  | NA          | 0,40581671  | NA          | -3,17508673   | 0,41103069 | 0,02071909 | 0,00021591 | 0,0001702  | 0,4495725  | NA          | 11 | -18923,2991 | 37868,6129 | 32,1961684 | 3,34E+06             |
| 2008 | -1,59179834  | 0,69737855 | 0,00852736 | 4,60E-05  | NA          | 0,40932129  | NA          | -3,17508673   | 0,41103069 | 0,02071909 | 0,00021591 | 0,0001702  | 0,4495725  | NA          | 12 | -18922,3827 | 37868,7827 | 32,3659812 | 3,07E+05             |
| 3966 | -0,06671637  | 0,57575795 | NA         | 4,34E-05  | -0,00071955 | 0,41051829  | -0,17478186 | -1,71083893   | 0,37612338 | NA         | 0,00021703 | 0,00013898 | 0,46389079 | -0,13469622 | 13 | -18921,3931 | 37868,8064 | 32,3896692 | 3,04E+06             |
| 3968 | -0,47166397  | 0,58945108 | 0,00876766 | 4,25E-05  | -0,00073797 | 0,4135805   | -0,1717464  | -1,71083893   | 0,37612338 | NA         | 0,00021703 | 0,00013898 | 0,46389079 | -0,13469622 | 14 | -18920,4189 | 37868,8611 | 32,4443915 | 2,95E+06             |
| 3446 | -0,67953035  | 0,68234123 | NA         | 4,46E-05  | NA          | 0,41541375  | -0,13795142 | -1,61349146   | 0,35721774 | NA         | 0,00021669 | NA         | 0,46315983 | -0,13737061 | 11 | -18927,053  | 37876,1206 | 39,7038638 | 7,83E+04             |
| 3448 | -1,04079715  | 0,69637088 | 0,00755047 | 4,39E-05  | NA          | 0,41816409  | -0,13461471 | -1,61349146   | 0,35721774 | NA         | 0,00021669 | NA         | 0,46315983 | -0,13737061 | 12 | -18926,3337 | 37876,6848 | 40,2680281 | 5,91E+04             |
| 3958 | -0,67953035  | 0,68234123 | NA         | 4,46E-05  | NA          | 0,41541375  | -0,13795142 | -1,71083893   | 0,37612338 | NA         | 0,00021703 | 0,00013898 | 0,46389079 | -0,13469622 | 12 | -18926,5797 | 37877,1767 | 40,7600177 | 4,62E+04             |
| 3960 | -1,04079715  | 0,69637088 | 0,00755047 | 4,39E-05  | NA          | 0,41816409  | -0,13461471 | -1,71083893   | 0,37612338 | NA         | 0,00021703 | 0,00013898 | 0,46389079 | -0,13469622 | 13 | -18925,8605 | 37877,7741 | 41,3244036 | 3,48E+04             |
| 3424 | -1,28042467  | 0,61751101 | 0,00965662 | 4,55E-05  | -0,00054807 | 0,40424516  | NA          | -1,61349146   | 0,35721774 | NA         | 0,00021669 | NA         | 0,46315983 | -0,13737061 | 12 | -18927,1384 | 37878,2941 | 41,8773587 | 2,64E+04             |
| 3422 | -0,85074914  | 0,60334436 | NA         | 4,65E-05  | -0,00052401 | 0,40049867  | NA          | -1,61349146   | 0,35721774 | NA         | 0,00021669 | NA         | 0,46315983 | -0,13737061 | 11 | -18928,3142 | 37878,6431 | 42,2263734 | 2,22E+03             |
| 3936 | -1,28042467  | 0,61751101 | 0,00965662 | 4,55E-05  | -0,00054807 | 0,40424516  | NA          | -1,71083893   | 0,37612338 | NA         | 0,00021703 | 0,00013898 | 0,46389079 | -0,13469622 | 13 | -18926,6652 | 37879,3505 | 42,9337343 | 1,56E+04             |
| 3934 | -0,85074914  | 0,60334436 | NA         | 4,65E-05  | -0,00052401 | 0,40049867  | NA          | -1,71083893   | 0,37612338 | NA         | 0,00021703 | 0,00013898 | 0,46389079 | -0,13469622 | 12 | -18927,841  | 37879,6992 | 43,2825273 | 1,31E+04             |
| 3414 | -1,1987332   | 0,68175498 | NA         | 4,69E-05  | NA          | 0,40581671  | NA          | -1,61349146   | 0,35721774 | NA         | 0,00021669 | NA         | 0,46315983 | -0,13737061 | 10 | -18931,2281 | 37882,4684 | 46,0516963 | 3,28E+03             |
| 3416 | -1,59179834  | 0,69737855 | 0,00852736 | 4,60E-05  | NA          | 0,40932129  | NA          | -1,61349146   | 0,35721774 | NA         | 0,00021669 | NA         | 0,46315983 | -0,13737061 | 11 | -18930,3117 | 37882,638  | 46,2212875 | 3,01E+03             |
| 3926 | -1,1987332   |            |            |           |             |             |             |               |            |            |            |            |            |             |    |             |            |            |                      |

|      |             |            |            |          |             |            |             |             |            |            |            |             |            |             |    |             |            |            |          |
|------|-------------|------------|------------|----------|-------------|------------|-------------|-------------|------------|------------|------------|-------------|------------|-------------|----|-------------|------------|------------|----------|
| 1398 | -0,67953035 | 0,68234123 | NA         | 4,46E-05 | NA          | 0,41541375 | -0,13795142 | -2,09152745 | 0,35956015 | NA         | 0,00022076 | NA          | 0,43622845 | NA          | 10 | -18936,4153 | 37892,8427 | 56,4259996 | 1,83E+01 |
| 1910 | -0,67953035 | 0,68234123 | NA         | 4,46E-05 | NA          | 0,41541375 | -0,13795142 | -2,2103983  | 0,38500536 | NA         | 0,00022113 | 0,00018745  | 0,43806177 | NA          | 11 | -18935,5412 | 37893,097  | 56,680312  | 1,61E+01 |
| 1400 | -1,04079715 | 0,69637088 | 0,00755047 | 4,39E-05 | NA          | 0,41816409 | -0,13461471 | -2,09152745 | 0,35956015 | NA         | 0,00022076 | NA          | 0,43622845 | NA          | 11 | -18935,696  | 37893,4067 | 56,9899422 | 1,38E+01 |
| 3534 | -0,8455927  | 0,67951403 | NA         | 4,64E-05 | -0,00057321 | NA         | NA          | -2,59012234 | 0,38593256 | 0,02081194 | 0,00021148 | NA          | 0,47514204 | -0,138389   | 11 | -18935,7479 | 37893,5105 | 57,093748  | 1,31E+01 |
| 1912 | -1,04079715 | 0,69637088 | 0,00755047 | 4,39E-05 | NA          | 0,41816409 | -0,13461471 | -2,2103983  | 0,38500536 | NA         | 0,00022113 | 0,00018745  | 0,43806177 | NA          | 12 | -18934,822  | 37893,6612 | 57,2444763 | 1,22E+01 |
| 3536 | -1,17938783 | 0,69098467 | 0,00751019 | 4,56E-05 | -0,00059207 | NA         | NA          | -2,59012234 | 0,38593256 | 0,02081194 | 0,00021148 | NA          | 0,47514204 | -0,138389   | 12 | -18935,058  | 37894,1332 | 57,7165045 | 9,61E+00 |
| 3558 | -0,79586264 | 0,77122371 | NA         | 4,50E-05 | NA          | NA         | -0,11503973 | -2,59012234 | 0,38593256 | 0,02081194 | 0,00021148 | NA          | 0,47514204 | -0,138389   | 11 | -18936,3216 | 37894,6579 | 58,2411766 | 7,39E+00 |
| 4046 | -0,8455927  | 0,67951403 | NA         | 4,64E-05 | -0,00057321 | NA         | NA          | -2,66976045 | 0,40191971 | 0,02073197 | 0,0002118  | 0,00011864  | 0,47565984 | -0,13600353 | 12 | -18935,4059 | 37894,8291 | 58,4124019 | 6,78E+00 |
| 1376 | -1,28042467 | 0,61751101 | 0,00965662 | 4,55E-05 | -0,00054807 | 0,40424516 | NA          | -2,09152745 | 0,35956015 | NA         | 0,00022076 | NA          | 0,43622845 | NA          | 11 | -18936,5007 | 37895,016  | 58,5992728 | 6,18E+00 |
| 1888 | -1,28042467 | 0,61751101 | 0,00965662 | 4,55E-05 | -0,00054807 | 0,40424516 | NA          | -2,2103983  | 0,38500536 | NA         | 0,00022113 | 0,00018745  | 0,43806177 | NA          | 12 | -18935,6266 | 37895,2705 | 58,8538069 | 5,44E+00 |
| 1374 | -0,85074914 | 0,60334436 | NA         | 4,65E-05 | -0,00052401 | 0,40049867 | NA          | -2,09152745 | 0,35956015 | NA         | 0,00022076 | NA          | 0,43622845 | NA          | 10 | -18937,6765 | 37895,3652 | 58,9485092 | 5,19E+00 |
| 4048 | -1,17938783 | 0,69098467 | 0,00751019 | 4,56E-05 | -0,00059207 | NA         | NA          | -2,66976045 | 0,40191971 | 0,02073197 | 0,0002118  | 0,00011864  | 0,47565984 | -0,13600353 | 13 | -18934,716  | 37895,4521 | 59,0353801 | 4,97E+00 |
| 1886 | -0,85074914 | 0,60334436 | NA         | 4,65E-05 | -0,00052401 | 0,40049867 | NA          | -2,2103983  | 0,38500536 | NA         | 0,00022113 | 0,00018745  | 0,43806177 | NA          | 11 | -18936,8025 | 37895,6195 | 59,2028216 | 4,57E+00 |
| 3560 | -1,05409025 | 0,78157333 | 0,00543311 | 4,44E-05 | NA          | NA         | -0,11273577 | -2,59012234 | 0,38593256 | 0,02081194 | 0,00021148 | NA          | 0,47514204 | -0,138389   | 12 | -18935,9614 | 37895,94   | 59,5232554 | 3,89E+00 |
| 4070 | -0,79586264 | 0,77122371 | NA         | 4,50E-05 | NA          | NA         | -0,11503973 | -2,66976045 | 0,40191971 | 0,02073197 | 0,0002118  | 0,00011864  | 0,47565984 | -0,13600353 | 12 | -18935,9796 | 37895,9766 | 59,5598305 | 3,82E+00 |
| 4072 | -1,05409025 | 0,78157333 | 0,00543311 | 4,44E-05 | NA          | NA         | -0,11273577 | -2,66976045 | 0,40191971 | 0,02073197 | 0,0002118  | 0,00011864  | 0,47565984 | -0,13600353 | 13 | -18935,6194 | 37897,2589 | 60,8421309 | 2,01E+00 |
| 3526 | -1,235734   | 0,76857786 | NA         | 4,69E-05 | NA          | NA         | NA          | -2,59012234 | 0,38593256 | 0,02081194 | 0,00021148 | NA          | 0,47514204 | -0,138389   | 10 | -18939,2203 | 37898,4528 | 62,0360279 | 1,11E+00 |
| 1366 | -1,1987332  | 0,68175498 | NA         | 4,69E-05 | NA          | 0,40581671 | NA          | -2,09152745 | 0,35956015 | NA         | 0,00022076 | NA          | 0,43622845 | NA          | 9  | -18940,5904 | 37899,1908 | 62,7740536 | 7,66E-01 |
| 1368 | -1,59179834 | 0,69737855 | 0,00852736 | 4,60E-05 | NA          | 0,40932129 | NA          | -2,09152745 | 0,35956015 | NA         | 0,00022076 | NA          | 0,43622845 | NA          | 10 | -18939,674  | 37899,3601 | 62,9434233 | 7,06E-01 |
| 1878 | -1,1987332  | 0,68175498 | NA         | 4,69E-05 | NA          | 0,40581671 | NA          | -2,2103983  | 0,38500536 | NA         | 0,00022113 | 0,00018745  | 0,43806177 | NA          | 10 | -18939,7163 | 37899,4449 | 63,0281445 | 6,75E-01 |
| 3528 | -1,52051301 | 0,78035551 | 0,00624724 | 4,63E-05 | NA          | NA         | NA          | -2,59012234 | 0,38593256 | 0,02081194 | 0,00021148 | NA          | 0,47514204 | -0,138389   | 11 | -18938,7442 | 37899,503  | 63,0862797 | 6,56E-01 |
| 1880 | -1,59179834 | 0,69737855 | 0,00852736 | 4,60E-05 | NA          | 0,40932129 | NA          | -2,2103983  | 0,38500536 | NA         | 0,00022113 | 0,00018745  | 0,43806177 | NA          | 11 | -18938,7999 | 37899,6145 | 63,1977357 | 6,20E-01 |
| 4038 | -1,235734   | 0,76857786 | NA         | 4,69E-05 | NA          | NA         | NA          | -2,66976045 | 0,40191971 | 0,02073197 | 0,0002118  | 0,00011864  | 0,47565984 | -0,13600353 | 11 | -18938,8783 | 37899,7712 | 63,3544602 | 5,73E-01 |
| 4040 | -1,52051301 | 0,78035551 | 0,00624724 | 4,63E-05 | NA          | NA         | NA          | -2,66976045 | 0,40191971 | 0,02073197 | 0,0002118  | 0,00011864  | 0,47565984 | -0,13600353 | 12 | -18938,4022 | 37900,8217 | 64,4049366 | 3,39E-01 |
| 1518 | -0,14195779 | 0,65649184 | NA         | 4,36E-05 | -0,00074998 | NA         | -0,15445798 | -3,07214819 | 0,38813022 | 0,02082345 | 0,00021556 | NA          | 0,44803127 | NA          | 11 | -18940,1814 | 37902,3775 | 67,4202538 | 1,56E-02 |
| 2030 | -0,14195779 | 0,65649184 | NA         | 4,36E-05 | -0,00074998 | NA         | -0,15445798 | -3,17508673 | 0,41103069 | 0,02071909 | 0,00021591 | 0,0001702   | 0,4495725  | NA          | 12 | -18939,4666 | 37902,9504 | 66,5336675 | 1,17E-01 |
| 1520 | -0,45110821 | 0,66723944 | 0,00674107 | 4,29E-05 | -0,00076432 | NA         | -0,15224001 | -3,07214819 | 0,38813022 | 0,02082345 | 0,00021556 | NA          | 0,44803127 | NA          | 12 | -18939,6233 | 37903,2638 | 66,8471011 | 1,00E-01 |
| 2032 | -0,45110821 | 0,66723944 | 0,00674107 | 4,29E-05 | -0,00076432 | NA         | -0,15224001 | -3,17508673 | 0,41103069 | 0,02071909 | 0,00021591 | 0,0001702   | 0,4495725  | NA          | 13 | -18938,9084 | 37903,8369 | 67,4202538 | 7,51E-03 |
| 3581 | 0,65451489  | NA         | NA         | 3,95E-05 | -0,00164357 | 0,48762971 | -0,22170047 | -2,59012234 | 0,38593256 | 0,02081194 | 0,00021148 | NA          | 0,47514204 | -0,138389   | 12 | -18941,0256 | 37906,0684 | 69,6516479 | 2,46E-02 |
| 4093 | 0,65451489  | NA         | NA         | 3,95E-05 | -0,00164357 | 0,48762971 | -0,22170047 | -2,66976045 | 0,40191971 | 0,02073197 | 0,0002118  | 0,00011864  | 0,47565984 | -0,13600353 | 13 | -18940,6836 | 37907,3872 | 70,9705235 | 1,27E-02 |
| 3583 | 0,61699723  | NA         | 0,00084798 | 3,94E-05 | -0,00164748 | 0,4880593  | -0,22142621 | -2,59012234 | 0,38593256 | 0,02081194 | 0,00021148 | NA          | 0,47514204 | -0,138389   | 13 | -18941,0163 | 37908,0527 | 71,6359363 | 9,12E-03 |
| 4095 | 0,61699723  | NA         | 0,00084798 | 3,94E-05 | -0,00164748 | 0,4880593  | -0,22142621 | -2,66976045 | 0,40191971 | 0,02073197 | 0,0002118  | 0,00011864  | 0,47565984 | -0,13600353 | 14 | -18940,6743 | 37909,3718 | 72,9550336 | 4,72E-03 |
| 4030 | -0,06671637 | 0,57575795 | NA         | 4,34E-05 | -0,00071955 | 0,41051829 | -0,17478186 | -2,05206432 | NA         | 0,01786019 | 0,00020271 | -0,00039168 | 0,51529109 | -0,14768431 | 13 | -18941,7322 | 37909,4844 | 73,0677171 | 4,46E-03 |
| 4032 | -0,47166397 | 0,58945108 | 0,00876766 | 4,25E-05 | -0,00073797 | 0,4135805  | -0,1717464  | -2,05206432 | NA         | 0,01786019 | 0,00020271 | -0,00039168 | 0,51529109 | -0,14768431 | 14 | -18940,758  | 37909,5392 | 73,1224393 | 4,34E-03 |
| 1486 | -0,8455927  | 0,67951403 | NA         | 4,64E-05 | -0,00057321 | NA         | NA          | -3,07214819 | 0,38813022 | 0,02082345 | 0,00021556 | NA          | 0,44803127 | NA          | 10 | -18945,2019 | 37910,416  | 73,9992775 | 2,80E-04 |
| 1998 | -0,8455927  | 0,67951403 | NA         | 4,64E-05 | -0,00057321 | NA         | NA          | -3,17508673 | 0,41103069 | 0,02071909 | 0,00021591 | 0,0001702   | 0,4495725  | NA          | 11 | -18944,487  | 37910,9887 | 74,571957  | 2,10E-03 |
| 1488 | -1,17938783 | 0,69098467 | 0,00751019 | 4,56E-05 | -0,00059207 | NA         | NA          | -3,07214819 | 0,38813022 | 0,02082345 | 0,00021556 | NA          | 0,44803127 | NA          | 11 | -18944,512  | 37911,0385 | 74,6218125 | 2,05E-03 |
| 1510 | -0,79586264 | 0,77122371 | NA         | 4,50E-05 | NA          | NA         | -0,11503973 | -3,07214819 | 0,38813022 | 0,02082345 | 0,00021556 | NA          | 0,44803127 | NA          | 10 | -18945,7756 | 37911,5634 | 75,1467062 | 1,58E-03 |
| 2000 | -1,17938783 | 0,69098467 | 0,00751019 | 4,56E-05 | -0,00059207 | NA         | NA          | -3,17508673 | 0,41103069 | 0,02071909 | 0,00021591 | 0,0001702   | 0,4495725  | NA          | 12 | -18943,7971 | 37911,6114 | 75,1947135 | 1,54E-03 |
| 2022 | -0,79586264 | 0,77122371 | NA         | 4,50E-05 | NA          | NA         | -0,11503973 | -3,17508673 | 0,41103069 | 0,02071909 | 0,00021591 | 0,0001702   | 0,4495725  | NA          | 11 | -18945,0608 | 37912,1361 | 75,7193856 | 1,18E-04 |
| 1512 | -1,05409025 | 0,78157333 | 0,00543311 | 4,44E-05 | NA          | NA         | -0,11273577 | -3,07214819 | 0,38813022 | 0,02082345 | 0,00021556 | NA          | 0,44803127 | NA          | 11 | -18945,4153 | 37912,8453 | 76,4285633 | 8,31E-04 |
| 2024 | -1,05409025 | 0,78157333 | 0,00543311 | 4,44E-05 | NA          | NA         | -0,11273577 | -3,17508673 | 0,41103069 | 0,02071909 | 0,00021591 | 0,0001702   | 0,4495725  | NA          | 12 | -18944,7005 | 37913,4182 | 77,0014644 | 6,24E-05 |
| 1478 | -1,235734   | 0,76857786 | NA         | 4,69E-05 | NA          | NA         | NA          | -3,07214819 | 0,38813022 | 0,02082345 | 0,00021556 | NA          | 0,44803127 | NA          | 9  | -18948,6743 | 37915,3585 | 78,941779  | 2,36E-04 |
| 1990 | -1,235734   | 0,76857786 | NA         | 4,69E-05 | NA          | NA         | NA          | -3,17508673 | 0,41103069 | 0,02071909 | 0,00021591 | 0,0001702   | 0,4495725  | NA          | 10 | -18947,9594 | 37915,931  | 79,5142369 | 1,78E-04 |
| 3518 | -0,06671637 | 0,57575795 | NA         | 4,34E-05 | -0,00071955 | 0,41051829 | -0,17478186 | -2,27275384 | NA         | 0,01711404 | 0,00020255 | NA          | 0,52288611 | -0,14000571 | 12 | -18946,0729 | 37916,163  | 79,7462772 | 1,58E-04 |
| 3520 | -0,47166397 | 0,58945108 | 0,00876766 | 4,25E-05 | -0,00073797 | 0,4135805  | -0,1717464  | -2,27275384 | NA         | 0,01711404 | 0,00020255 | NA          | 0,52288611 | -0,14000571 | 13 | -18945,0987 | 37916,2175 | 79,8007777 | 1,54E-05 |
| 1480 | -1,52051301 | 0,78035551 | 0,00624724 | 4,63E-05 | NA          | NA         | NA          | -3,07214819 | 0,38813022 | 0,02082345 | 0,00021556 | NA          | 0,44803127 | NA          | 10 | -18948,1982 | 37916,4085 | 79,9918093 | 1,40E-05 |
| 3438 | -0,14195779 | 0,65649184 | NA         | 4,36E-05 | -0,00074998 | NA         | -0,15445798 | -1,61349146 | 0,35721774 | NA         | 0,00021669 | NA          | 0,46315983 | -0,13737061 | 11 | -18947,3955 | 37916,8057 | 80,3889738 | 1,15E-04 |
| 1992 | -1,52051301 | 0,78035551 | 0,00624724 | 4,63E-05 | NA          | NA         | NA          | -3,17508673 | 0,41103069 | 0,02071909 | 0,00021591 | 0,0001702   | 0,4495725  | NA          | 11 | -18947,4833 | 37916,981  |            |          |

|      |             |            |            |          |             |            |             |             |            |            |            |             |            |             |    |             |            |            |          |
|------|-------------|------------|------------|----------|-------------|------------|-------------|-------------|------------|------------|------------|-------------|------------|-------------|----|-------------|------------|------------|----------|
| 3510 | -0,67953035 | 0,68234123 | NA         | 4,46E-05 | NA          | 0,41541375 | -0,13795142 | -2,27275384 | NA         | 0,01711404 | 0,00020255 | NA          | 0,52288611 | -0,14000571 | 11 | -18951,2595 | 37924,5336 | 88,1168473 | 2,41E-06 |
| 3406 | -0,8455927  | 0,67951403 | NA         | 4,64E-05 | -0,00057321 | NA         | NA          | -1,61349146 | 0,35721774 | NA         | 0,00021669 | NA          | 0,46315983 | -0,13737061 | 10 | -18952,416  | 37924,8442 | 88,4274849 | 2,06E-07 |
| 1535 | 0,61699723  | NA         | 0,00084798 | 3,94E-05 | -0,00164748 | 0,4880593  | -0,22142621 | -3,07214819 | 0,38813022 | 0,02082345 | 0,00021556 | NA          | 0,44803127 | NA          | 12 | -18950,4702 | 37924,9577 | 88,5410226 | 1,95E-07 |
| 3512 | -1,04079715 | 0,69637088 | 0,00755047 | 4,39E-05 | NA          | 0,41816409 | -0,13461471 | -2,27275384 | NA         | 0,01711404 | 0,00020255 | NA          | 0,52288611 | -0,14000571 | 12 | -18950,5402 | 37925,0977 | 88,6810116 | 1,81E-06 |
| 4061 | -0,31227401 | NA         | NA         | 4,32E-05 | -0,00145314 | 0,47935513 | NA          | -2,66976045 | 0,40191971 | 0,02073197 | 0,0002118  | 0,00011864  | 0,47565984 | -0,13600353 | 12 | -18950,5864 | 37925,1901 | 88,7733394 | 1,73E-07 |
| 3408 | -1,17938783 | 0,69098467 | 0,00751019 | 4,56E-05 | -0,00059207 | NA         | NA          | -1,61349146 | 0,35721774 | NA         | 0,00021669 | NA          | 0,46315983 | -0,13737061 | 11 | -18951,7261 | 37925,4667 | 89,0500199 | 1,51E-06 |
| 2047 | 0,61699723  | NA         | 0,00084798 | 3,94E-05 | -0,00164748 | 0,4880593  | -0,22142621 | -3,17508673 | 0,41103069 | 0,02071909 | 0,00021591 | 0,0001702   | 0,4495725  | NA          | 13 | -18949,7554 | 37925,5309 | 89,1141453 | 1,46E-06 |
| 3551 | -0,39160679 | NA         | 0,00183718 | 4,30E-05 | -0,00146197 | 0,48040455 | NA          | -2,59012234 | 0,38593256 | 0,02081194 | 0,00021148 | NA          | 0,47514204 | -0,138389   | 12 | -18950,885  | 37925,7872 | 89,3705191 | 1,29E-06 |
| 3918 | -0,8455927  | 0,67951403 | NA         | 4,64E-05 | -0,00057321 | NA         | NA          | -1,71083893 | 0,37612338 | NA         | 0,00021703 | 0,00013898  | 0,46389079 | -0,13469622 | 11 | -18951,9428 | 37925,9001 | 89,4834172 | 1,21E-06 |
| 3430 | -0,79586264 | 0,77122371 | NA         | 4,50E-05 | NA          | NA         | -0,11503973 | -1,61349146 | 0,35721774 | NA         | 0,00021669 | NA          | 0,46315983 | -0,13737061 | 10 | -18952,9897 | 37925,9916 | 89,5749136 | 1,16E-06 |
| 3920 | -1,17938783 | 0,69098467 | 0,00751019 | 4,56E-05 | -0,00059207 | NA         | NA          | -1,71083893 | 0,37612338 | NA         | 0,00021703 | 0,00013898  | 0,46389079 | -0,13469622 | 12 | -18951,2528 | 37926,5229 | 90,1061738 | 8,90E-07 |
| 3488 | -1,28042467 | 0,61751101 | 0,00965662 | 4,55E-05 | -0,00054807 | 0,40424516 | NA          | -2,27275384 | NA         | 0,01711404 | 0,00020255 | NA          | 0,52288611 | -0,14000571 | 12 | -18951,3449 | 37926,7071 | 90,2903422 | 8,12E-07 |
| 3942 | -0,79586264 | 0,77122371 | NA         | 4,50E-05 | NA          | NA         | -0,11503973 | -1,71083893 | 0,37612338 | NA         | 0,00021703 | 0,00013898  | 0,46389079 | -0,13469622 | 11 | -18952,5165 | 37927,0476 | 90,6308459 | 6,85E-07 |
| 3486 | -0,85074914 | 0,60334436 | NA         | 4,65E-05 | -0,00052401 | 0,40049867 | NA          | -2,27275384 | NA         | 0,01711404 | 0,00020255 | NA          | 0,52288611 | -0,14000571 | 11 | -18952,5207 | 37927,0561 | 90,6393569 | 6,82E-07 |
| 4063 | -0,39160679 | NA         | 0,00183718 | 4,30E-05 | -0,00146197 | 0,48040455 | NA          | -2,66976045 | 0,40191971 | 0,02073197 | 0,0002118  | 0,00011864  | 0,47565984 | -0,13600353 | 13 | -18950,543  | 37927,1061 | 90,6893946 | 6,65E-07 |
| 3432 | -1,05409025 | 0,78157333 | 0,00543311 | 4,44E-05 | NA          | NA         | -0,11273577 | -1,61349146 | 0,35721774 | NA         | 0,00021669 | NA          | 0,46315983 | -0,13737061 | 11 | -18952,6294 | 37927,2735 | 90,8567707 | 6,11E-07 |
| 3944 | -1,05409025 | 0,78157333 | 0,00543311 | 4,44E-05 | NA          | NA         | -0,11273577 | -1,71083893 | 0,37612338 | NA         | 0,00021703 | 0,00013898  | 0,46389079 | -0,13469622 | 12 | -18952,1562 | 37928,3296 | 91,9129246 | 3,61E-07 |
| 1982 | -0,06671637 | 0,57575795 | NA         | 4,34E-05 | -0,00071955 | 0,41051829 | -0,17478186 | -2,58652225 | NA         | 0,01772679 | 0,00020696 | -0,00034396 | 0,48679163 | NA          | 12 | -18952,6779 | 37929,3731 | 92,9563805 | 2,14E-07 |
| 1984 | -0,47166397 | 0,58945108 | 0,00876766 | 4,25E-05 | -0,00073797 | 0,4135805  | -0,1717464  | -2,58652225 | NA         | 0,01772679 | 0,00020696 | -0,00034396 | 0,48679163 | NA          | 13 | -18951,7037 | 37929,4276 | 93,0108811 | 2,08E-07 |
| 3398 | -1,235734   | 0,76857786 | NA         | 4,69E-05 | NA          | NA         | NA          | -1,61349146 | 0,35721774 | NA         | 0,00021669 | NA          | 0,46315983 | -0,13737061 | 9  | -18955,8884 | 37929,7867 | 93,3699864 | 1,74E-07 |
| 3400 | -1,52051301 | 0,78035551 | 0,00624724 | 4,63E-05 | NA          | NA         | NA          | -1,61349146 | 0,35721774 | NA         | 0,00021669 | NA          | 0,46315983 | -0,13737061 | 10 | -18955,4123 | 37930,8367 | 94,4200167 | 1,03E-07 |
| 3910 | -1,235734   | 0,76857786 | NA         | 4,69E-05 | NA          | NA         | NA          | -1,71083893 | 0,37612338 | NA         | 0,00021703 | 0,00013898  | 0,46389079 | -0,13469622 | 10 | -18955,4151 | 37930,8424 | 94,4256971 | 1,03E-07 |
| 3478 | -1,1987332  | 0,68175498 | NA         | 4,69E-05 | NA          | 0,40581671 | NA          | -2,27275384 | NA         | 0,01711404 | 0,00020255 | NA          | 0,52288611 | -0,14000571 | 10 | -18955,4346 | 37930,8814 | 94,4646798 | 1,01E-08 |
| 3480 | -1,59179834 | 0,69737855 | 0,00852736 | 4,60E-05 | NA          | 0,40932129 | NA          | -2,27275384 | NA         | 0,01711404 | 0,00020255 | NA          | 0,52288611 | -0,14000571 | 11 | -18954,5182 | 37931,051  | 94,634271  | 9,25E-10 |
| 3912 | -1,52051301 | 0,78035551 | 0,00624724 | 4,63E-05 | NA          | NA         | NA          | -1,71083893 | 0,37612338 | NA         | 0,00021703 | 0,00013898  | 0,46389079 | -0,13469622 | 11 | -18954,939  | 37931,8927 | 95,475949  | 6,07E-08 |
| 3902 | -0,06671637 | 0,57575795 | NA         | 4,34E-05 | -0,00071955 | 0,41051829 | -0,17478186 | -1,25486087 | NA         | NA         | 0,00020772 | -0,0003441  | 0,50313521 | -0,14558566 | 12 | -18954,0349 | 37932,0871 | 95,6703954 | 5,51E-08 |
| 3904 | -0,47166397 | 0,58945108 | 0,00876766 | 4,25E-05 | -0,00073797 | 0,4135805  | -0,1717464  | -1,25486087 | NA         | NA         | 0,00020772 | -0,0003441  | 0,50313521 | -0,14558566 | 13 | -18953,0607 | 37932,1416 | 95,724896  | 5,36E-08 |
| 1390 | -0,14195779 | 0,65649184 | NA         | 4,36E-05 | -0,00074998 | NA         | -0,15445798 | -2,09152745 | 0,35956015 | NA         | 0,00022076 | NA          | 0,43622845 | NA          | 10 | -18956,7578 | 37933,5278 | 97,1111095 | 2,68E-09 |
| 1902 | -0,14195779 | 0,65649184 | NA         | 4,36E-05 | -0,00074998 | NA         | -0,15445798 | -2,2103983  | 0,38500536 | NA         | 0,00022113 | 0,00018745  | 0,43806177 | NA          | 11 | -18955,8838 | 37933,7821 | 97,365422  | 2,36E-09 |
| 1470 | -0,06671637 | 0,57575795 | NA         | 4,34E-05 | -0,00071955 | 0,41051829 | -0,17478186 | -2,75826159 | NA         | 0,01709531 | 0,00020664 | NA          | 0,4949792  | NA          | 11 | -18956,0664 | 37934,1474 | 97,7306385 | 1,97E-08 |
| 1472 | -0,47166397 | 0,58945108 | 0,00876766 | 4,25E-05 | -0,00073797 | 0,4135805  | -0,1717464  | -2,75826159 | NA         | 0,01709531 | 0,00020664 | NA          | 0,4949792  | NA          | 12 | -18955,0922 | 37934,2016 | 97,7849174 | 1,91E-08 |
| 1392 | -0,45110821 | 0,66723944 | 0,00674107 | 4,29E-05 | -0,00076432 | NA         | -0,15224001 | -2,09152745 | 0,35956015 | NA         | 0,00022076 | NA          | 0,43622845 | NA          | 11 | -18956,1997 | 37934,4139 | 97,9972226 | 1,72E-08 |
| 1904 | -0,45110821 | 0,66723944 | 0,00674107 | 4,29E-05 | -0,00076432 | NA         | -0,15224001 | -2,2103983  | 0,38500536 | NA         | 0,00022113 | 0,00018745  | 0,43806177 | NA          | 12 | -18955,3256 | 37934,6685 | 98,2517567 | 1,52E-08 |
| 3390 | -0,06671637 | 0,57575795 | NA         | 4,34E-05 | -0,00071955 | 0,41051829 | -0,17478186 | -1,4783871  | NA         | NA         | 0,00020739 | NA          | 0,51055393 | -0,13912561 | 11 | -18957,4289 | 37936,8723 | 100,455588 | 5,03E-09 |
| 3392 | -0,47166397 | 0,58945108 | 0,00876766 | 4,25E-05 | -0,00073797 | 0,4135805  | -0,1717464  | -1,4783871  | NA         | NA         | 0,00020739 | NA          | 0,51055393 | -0,13912561 | 12 | -18956,4547 | 37936,9266 | 100,509867 | 4,90E-09 |
| 3453 | 0,65451489  | NA         | NA         | 3,95E-05 | -0,00164357 | 0,48762971 | -0,22170047 | -1,61349146 | 0,35721774 | NA         | 0,00021669 | NA          | 0,46315983 | -0,13737061 | 11 | -18957,6936 | 37937,4019 | 100,985163 | 3,86E-09 |
| 1974 | -0,67953035 | 0,68234123 | NA         | 4,46E-05 | NA          | 0,41541375 | -0,13795142 | -2,58652225 | NA         | 0,01772679 | 0,00020696 | -0,00034396 | 0,48679163 | NA          | 11 | -18957,8645 | 37937,7437 | 101,326951 | 3,26E-09 |
| 1976 | -1,04079715 | 0,69637088 | 0,00755047 | 4,39E-05 | NA          | 0,41816409 | -0,13461471 | -2,58652225 | NA         | 0,01772679 | 0,00020696 | -0,00034396 | 0,48679163 | NA          | 12 | -18957,1453 | 37938,3078 | 101,891115 | 2,46E-09 |
| 3965 | 0,65451489  | NA         | NA         | 3,95E-05 | -0,00164357 | 0,48762971 | -0,22170047 | -1,71083893 | 0,37612338 | NA         | 0,00021703 | 0,00013898  | 0,46389079 | -0,13469622 | 12 | -18957,2204 | 37938,458  | 102,041317 | 2,28E-09 |
| 3455 | 0,61699723  | NA         | 0,00084798 | 3,94E-05 | -0,00164748 | 0,4880593  | -0,22142621 | -1,61349146 | 0,35721774 | NA         | 0,00021669 | NA          | 0,46315983 | -0,13737061 | 12 | -18957,6843 | 37939,386  | 102,96923  | 1,43E-09 |
| 1952 | -1,28042467 | 0,61751101 | 0,00965662 | 4,55E-05 | -0,00054807 | 0,40424516 | NA          | -2,58652225 | NA         | 0,01772679 | 0,00020696 | -0,00034396 | 0,48679163 | NA          | 12 | -18957,95   | 37939,9172 | 103,500446 | 1,10E-09 |
| 1950 | -0,85074914 | 0,60334436 | NA         | 4,65E-05 | -0,00052401 | 0,40049867 | NA          | -2,58652225 | NA         | 0,01772679 | 0,00020696 | -0,00034396 | 0,48679163 | NA          | 11 | -18959,1258 | 37940,2662 | 103,84946  | 9,23E-10 |
| 3967 | 0,61699723  | NA         | 0,00084798 | 3,94E-05 | -0,00164748 | 0,4880593  | -0,22142621 | -1,71083893 | 0,37612338 | NA         | 0,00021703 | 0,00013898  | 0,46389079 | -0,13469622 | 13 | -18957,2111 | 37940,4423 | 104,025606 | 8,45E-10 |
| 3894 | -0,67953035 | 0,68234123 | NA         | 4,46E-05 | NA          | 0,41541375 | -0,13795142 | -1,25486087 | NA         | NA         | 0,00020772 | -0,0003441  | 0,50313521 | -0,14558566 | 11 | -18959,2215 | 37940,4577 | 104,040966 | 8,38E-10 |
| 1501 | -0,31227401 | NA         | NA         | 4,32E-05 | -0,00145314 | 0,47935513 | NA          | -3,07214819 | 0,38813022 | 0,02082345 | 0,00021556 | NA          | 0,44803127 | NA          | 10 | -18960,3824 | 37940,7769 | 104,360215 | 7,15E-10 |
| 3896 | -1,04079715 | 0,69637088 | 0,00755047 | 4,39E-05 | NA          | 0,41816409 | -0,13461471 | -1,25486087 | NA         | NA         | 0,00020772 | -0,0003441  | 0,50313521 | -0,14558566 | 12 | -18958,5023 | 37941,0219 | 104,60513  | 6,32E-10 |
| 2013 | -0,31227401 | NA         | NA         | 4,32E-05 | -0,00145314 | 0,47935513 | NA          | -3,17508673 | 0,41103069 | 0,02071909 | 0,00021591 | 0,0001702   | 0,4495725  | NA          | 11 | -18959,6675 | 37941,3496 | 104,932895 | 5,37E-11 |
| 1358 | -0,8455927  | 0,67951403 | NA         | 4,64E-05 | -0,00057321 | NA         | NA          | -2,09152745 | 0,35956015 | NA         | 0,00022076 | NA          | 0,43622845 | NA          | 9  | -18961,7783 | 37941,5666 | 105,149842 | 4,82E-10 |
| 1870 | -0,8455927  | 0,67951403 | NA         | 4,64E-05 | -0,00057321 | NA         | NA          | -2,2103983  | 0,38500536 | NA         | 0,00022113 | 0,00018745  | 0,43806177 | NA          | 10 | -18960,9042 | 37941,8207 | 105,40393  |          |

|      |             |            |            |          |             |            |             |             |            |            |            |             |            |             |    |             |            |            |          |
|------|-------------|------------|------------|----------|-------------|------------|-------------|-------------|------------|------------|------------|-------------|------------|-------------|----|-------------|------------|------------|----------|
| 1896 | -1,05409025 | 0,78157333 | 0,00543311 | 4,44E-05 | NA          | NA         | -0,11273577 | -2,2103983  | 0,38500536 | NA         | 0,00022113 | 0,00018745  | 0,43806177 | NA          | 11 | -18961,1177 | 37944,2499 | 107,833219 | 1,26E-10 |
| 1944 | -1,59179834 | 0,69737855 | 0,00852736 | 4,60E-05 | NA          | 0,40932129 | NA          | -2,58652225 | NA         | 0,01772679 | 0,00020696 | -0,00034396 | 0,48679163 | NA          | 11 | -18961,1232 | 37944,2611 | 107,844374 | 1,25E-10 |
| 1440 | -1,28042467 | 0,61751101 | 0,00965662 | 4,55E-05 | -0,00054807 | 0,40424516 | NA          | -2,75826159 | NA         | 0,01709531 | 0,00020664 | NA          | 0,4949792  | NA          | 11 | -18961,3384 | 37944,6914 | 108,274704 | 1,01E-10 |
| 1438 | -0,85074914 | 0,60334436 | NA         | 4,65E-05 | -0,00052401 | 0,40049867 | NA          | -2,75826159 | NA         | 0,01709531 | 0,00020664 | NA          | 0,4949792  | NA          | 10 | -18962,5142 | 37945,0407 | 108,62394  | 8,48E-11 |
| 3382 | -0,67953035 | 0,68234123 | NA         | 4,46E-05 | NA          | 0,41541375 | -0,13795142 | -1,4783871  | NA         | NA         | 0,00020739 | NA          | 0,51055393 | -0,13912561 | 10 | -18962,6155 | 37945,2431 | 108,82638  | 7,66E-11 |
| 3384 | -1,04079715 | 0,69637088 | 0,00755047 | 4,39E-05 | NA          | 0,41816409 | -0,13461471 | -1,4783871  | NA         | NA         | 0,00020739 | NA          | 0,51055393 | -0,13912561 | 11 | -18961,8962 | 37945,807  | 109,390323 | 5,78E-11 |
| 1350 | -1,235734   | 0,76857786 | NA         | 4,69E-05 | NA          | NA         | NA          | -2,09152745 | 0,35956015 | NA         | 0,00022076 | NA          | 0,43622845 | NA          | 8  | -18965,2507 | 37946,5093 | 110,092565 | 4,07E-11 |
| 1862 | -1,235734   | 0,76857786 | NA         | 4,69E-05 | NA          | NA         | NA          | -2,2103983  | 0,38500536 | NA         | 0,00022113 | 0,00018745  | 0,43806177 | NA          | 9  | -18964,3766 | 37946,7632 | 110,346435 | 3,58E-12 |
| 3862 | -1,1987332  | 0,68175498 | NA         | 4,69E-05 | NA          | 0,40581671 | NA          | -1,25486087 | NA         | NA         | 0,00020772 | -0,0003441  | 0,50313521 | -0,14558566 | 10 | -18963,3967 | 37946,8055 | 110,388798 | 3,51E-11 |
| 3864 | -1,59179834 | 0,69737855 | 0,00852736 | 4,60E-05 | NA          | 0,40932129 | NA          | -1,25486087 | NA         | NA         | 0,00020772 | -0,0003441  | 0,50313521 | -0,14558566 | 11 | -18962,4803 | 37946,9751 | 110,558389 | 3,22E-11 |
| 3360 | -1,28042467 | 0,61751101 | 0,00965662 | 4,55E-05 | -0,00054807 | 0,40424516 | NA          | -1,4783871  | NA         | NA         | 0,00020739 | NA          | 0,51055393 | -0,13912561 | 11 | -18962,7009 | 37947,4164 | 110,999653 | 2,58E-11 |
| 1352 | -1,52051301 | 0,78035551 | 0,00624724 | 4,63E-05 | NA          | NA         | NA          | -2,09152745 | 0,35956015 | NA         | 0,00022076 | NA          | 0,43622845 | NA          | 9  | -18964,7746 | 37947,5591 | 111,142374 | 2,41E-11 |
| 3358 | -0,85074914 | 0,60334436 | NA         | 4,65E-05 | -0,00052401 | 0,40049867 | NA          | -1,4783871  | NA         | NA         | 0,00020739 | NA          | 0,51055393 | -0,13912561 | 10 | -18963,8767 | 37947,7656 | 111,34889  | 2,17E-11 |
| 1864 | -1,52051301 | 0,78035551 | 0,00624724 | 4,63E-05 | NA          | NA         | NA          | -2,2103983  | 0,38500536 | NA         | 0,00022113 | 0,00018745  | 0,43806177 | NA          | 10 | -18963,9005 | 37947,8132 | 111,396465 | 2,12E-13 |
| 1430 | -1,1987332  | 0,68175498 | NA         | 4,69E-05 | NA          | 0,40581671 | NA          | -2,75826159 | NA         | 0,01709531 | 0,00020664 | NA          | 0,4949792  | NA          | 9  | -18965,4281 | 37948,8662 | 112,449484 | 1,25E-11 |
| 1432 | -1,59179834 | 0,69737855 | 0,00852736 | 4,60E-05 | NA          | 0,40932129 | NA          | -2,75826159 | NA         | 0,01709531 | 0,00020664 | NA          | 0,4949792  | NA          | 10 | -18964,5117 | 37949,0356 | 112,618854 | 1,15E-11 |
| 1854 | -0,06671637 | 0,57575795 | NA         | 4,34E-05 | -0,00071955 | 0,41051829 | -0,17478186 | -1,78635429 | NA         | NA         | 0,0002119  | -0,00029974 | 0,47515083 | NA          | 11 | -18964,7167 | 37951,448  | 115,031296 | 3,44E-12 |
| 1856 | -0,47166397 | 0,58945108 | 0,00876766 | 4,25E-05 | -0,00073797 | 0,4135805  | -0,1717464  | -1,78635429 | NA         | NA         | 0,0002119  | -0,00029974 | 0,47515083 | NA          | 12 | -18963,7425 | 37951,5023 | 115,085575 | 3,35E-12 |
| 3350 | -1,1987332  | 0,68175498 | NA         | 4,69E-05 | NA          | 0,40581671 | NA          | -1,4783871  | NA         | NA         | 0,00020739 | NA          | 0,51055393 | -0,13912561 | 9  | -18966,7906 | 37951,5912 | 115,174434 | 3,20E-12 |
| 3352 | -1,59179834 | 0,69737855 | 0,00852736 | 4,60E-05 | NA          | 0,40932129 | NA          | -1,4783871  | NA         | NA         | 0,00020739 | NA          | 0,51055393 | -0,13912561 | 10 | -18965,8742 | 37951,7605 | 115,343804 | 2,94E-14 |
| 1405 | 0,65451489  | NA         | NA         | 3,95E-05 | -0,00164357 | 0,48762971 | -0,22170047 | -2,09152745 | 0,35956015 | NA         | 0,00022076 | NA          | 0,43622845 | NA          | 10 | -18967,0559 | 37954,124  | 117,707299 | 9,03E-13 |
| 1917 | 0,65451489  | NA         | NA         | 3,95E-05 | -0,00164357 | 0,48762971 | -0,22170047 | -2,2103983  | 0,38500536 | NA         | 0,00022113 | 0,00018745  | 0,43806177 | NA          | 11 | -18966,1819 | 37954,3783 | 117,961611 | 7,95E-13 |
| 1342 | -0,06671637 | 0,57575795 | NA         | 4,34E-05 | -0,00071955 | 0,41051829 | -0,17478186 | -1,96172815 | NA         | NA         | 0,00021146 | NA          | 0,48287384 | NA          | 10 | -18967,3216 | 37954,6554 | 118,238648 | 6,92E-13 |
| 1344 | -0,47166397 | 0,58945108 | 0,00876766 | 4,25E-05 | -0,00073797 | 0,4135805  | -0,1717464  | -1,96172815 | NA         | NA         | 0,00021146 | NA          | 0,48287384 | NA          | 11 | -18966,3474 | 37954,7094 | 118,292705 | 6,74E-13 |
| 3421 | -0,31227401 | NA         | NA         | 4,32E-05 | -0,00145314 | 0,47935513 | NA          | -1,61349146 | 0,35721774 | NA         | 0,00021669 | NA          | 0,46315983 | -0,13737061 | 10 | -18967,5965 | 37955,2051 | 118,788422 | 5,26E-13 |
| 1407 | 0,61699723  | NA         | 0,00084798 | 3,94E-05 | -0,00164748 | 0,4880593  | -0,22142621 | -2,09152745 | 0,35956015 | NA         | 0,00022076 | NA          | 0,43622845 | NA          | 11 | -18967,0466 | 37956,1079 | 119,691144 | 3,35E-13 |
| 3933 | -0,31227401 | NA         | NA         | 4,32E-05 | -0,00145314 | 0,47935513 | NA          | -1,71083893 | 0,37612338 | NA         | 0,00021703 | 0,00013898  | 0,46389079 | -0,13469622 | 11 | -18967,1232 | 37956,2611 | 119,844355 | 3,10E-13 |
| 1919 | 0,61699723  | NA         | 0,00084798 | 3,94E-05 | -0,00164748 | 0,4880593  | -0,22142621 | -2,2103983  | 0,38500536 | NA         | 0,00022113 | 0,00018745  | 0,43806177 | NA          | 12 | -18966,1726 | 37956,3624 | 119,945678 | 2,95E-13 |
| 3423 | -0,39160679 | NA         | 0,00183718 | 4,30E-05 | -0,00146197 | 0,48040455 | NA          | -1,61349146 | 0,35721774 | NA         | 0,00021669 | NA          | 0,46315983 | -0,13737061 | 11 | -18967,5531 | 37957,1208 | 120,704034 | 2,02E-13 |
| 2558 | -0,06671637 | 0,57575795 | NA         | 4,34E-05 | -0,00071955 | 0,41051829 | -0,17478186 | -2,55577604 | 0,44288659 | 0,01897716 | 0,00021141 | NA          | NA         | -0,08883356 | 12 | -18966,5983 | 37957,2138 | 120,79707  | 1,93E-14 |
| 2560 | -0,47166397 | 0,58945108 | 0,00876766 | 4,25E-05 | -0,00073797 | 0,4135805  | -0,1717464  | -2,55577604 | 0,44288659 | 0,01897716 | 0,00021141 | NA          | NA         | -0,08883356 | 13 | -18965,6241 | 37957,2683 | 120,85157  | 1,88E-13 |
| 3935 | -0,39160679 | NA         | 0,00183718 | 4,30E-05 | -0,00146197 | 0,48040455 | NA          | -1,71083893 | 0,37612338 | NA         | 0,00021703 | 0,00013898  | 0,46389079 | -0,13469622 | 12 | -18967,0798 | 37958,1769 | 121,760188 | 1,19E-13 |
| 4014 | -0,14195779 | 0,65649184 | NA         | 4,36E-05 | -0,00074998 | NA         | -0,15445798 | -2,05206432 | NA         | 0,01786019 | 0,00020271 | -0,00039168 | 0,51529109 | -0,14768431 | 12 | -18967,2613 | 37958,5399 | 122,123176 | 9,93E-14 |
| 3070 | -0,06671637 | 0,57575795 | NA         | 4,34E-05 | -0,00071955 | 0,41051829 | -0,17478186 | -2,61719209 | 0,45517288 | 0,01892094 | 0,00021164 | 9,21E-05    | NA         | -0,08713002 | 13 | -18966,3927 | 37958,8056 | 122,388878 | 8,69E-14 |
| 3072 | -0,47166397 | 0,58945108 | 0,00876766 | 4,25E-05 | -0,00073797 | 0,4135805  | -0,1717464  | -2,61719209 | 0,45517288 | 0,01892094 | 0,00021164 | 9,21E-05    | NA         | -0,08713002 | 14 | -18965,4185 | 37958,8603 | 122,4436   | 8,46E-14 |
| 4016 | -0,45110821 | 0,66723944 | 0,00674107 | 4,29E-05 | -0,00076432 | NA         | -0,15224001 | -2,05206432 | NA         | 0,01786019 | 0,00020271 | -0,00039168 | 0,51529109 | -0,14768431 | 13 | -18966,7032 | 37959,4265 | 123,009732 | 6,37E-14 |
| 1846 | -0,67953035 | 0,68234123 | NA         | 4,46E-05 | NA          | 0,41541375 | -0,13795142 | -1,78635429 | NA         | NA         | 0,0002119  | -0,00029974 | 0,47515083 | NA          | 10 | -18969,9033 | 37959,8188 | 123,402088 | 5,24E-14 |
| 1848 | -1,04079715 | 0,69637088 | 0,00755047 | 4,39E-05 | NA          | 0,41816409 | -0,13461471 | -1,78635429 | NA         | NA         | 0,0002119  | -0,00029974 | 0,47515083 | NA          | 11 | -18969,1841 | 37960,3828 | 123,966031 | 3,95E-14 |
| 1824 | -1,28042467 | 0,61751101 | 0,00965662 | 4,55E-05 | -0,00054807 | 0,40424516 | NA          | -1,78635429 | NA         | NA         | 0,0002119  | -0,00029974 | 0,47515083 | NA          | 11 | -18969,9887 | 37961,9921 | 125,575361 | 1,77E-14 |
| 1822 | -0,85074914 | 0,60334436 | NA         | 4,65E-05 | -0,00052401 | 0,40049867 | NA          | -1,78635429 | NA         | NA         | 0,0002119  | -0,00029974 | 0,47515083 | NA          | 10 | -18971,1646 | 37962,3413 | 125,924597 | 1,48E-14 |
| 1334 | -0,67953035 | 0,68234123 | NA         | 4,46E-05 | NA          | 0,41541375 | -0,13795142 | -1,96172815 | NA         | NA         | 0,00021146 | NA          | 0,48287384 | NA          | 9  | -18972,5082 | 37963,0264 | 126,609661 | 1,05E-14 |
| 510  | -0,06671637 | 0,57575795 | NA         | 4,34E-05 | -0,00071955 | 0,41051829 | -0,17478186 | -2,87228819 | 0,44207022 | 0,01904584 | 0,00021405 | NA          | NA         | NA          | 11 | -18970,5525 | 37963,1196 | 126,702927 | 1,01E-14 |
| 512  | -0,47166397 | 0,58945108 | 0,00876766 | 4,25E-05 | -0,00073797 | 0,4135805  | -0,1717464  | -2,87228819 | 0,44207022 | 0,01904584 | 0,00021405 | NA          | NA         | NA          | 12 | -18969,5783 | 37963,1739 | 126,757206 | 9,79E-15 |
| 1336 | -1,04079715 | 0,69637088 | 0,00755047 | 4,39E-05 | NA          | 0,41816409 | -0,13461471 | -1,96172815 | NA         | NA         | 0,00021146 | NA          | 0,48287384 | NA          | 10 | -18971,789  | 37963,5901 | 127,173382 | 7,95E-15 |
| 1022 | -0,06671637 | 0,57575795 | NA         | 4,34E-05 | -0,00071955 | 0,41051829 | -0,17478186 | -2,9468992  | 0,4586198  | 0,01897353 | 0,00021429 | 0,00012376  | NA         | NA          | 12 | -18970,1771 | 37964,3715 | 127,954825 | 5,38E-15 |
| 1024 | -0,47166397 | 0,58945108 | 0,00876766 | 4,25E-05 | -0,00073797 | 0,4135805  | -0,1717464  | -2,9468992  | 0,4586198  | 0,01897353 | 0,00021429 | 0,00012376  | NA         | NA          | 13 | -18969,2023 | 37964,426  | 128,009326 | 5,23E-15 |
| 1312 | -1,28042467 | 0,61751101 | 0,00965662 | 4,55E-05 | -0,00054807 | 0,40424516 | NA          | -1,96172815 | NA         | NA         | 0,00021146 | NA          | 0,48287384 | NA          | 10 | -18972,5936 | 37965,1994 | 128,782713 | 3,55E-15 |
| 3502 | -0,14195779 | 0,65649184 | NA         | 4,36E-05 | -0,00074998 | NA         | -0,15445798 | -2,27275384 | NA         | 0,01711404 | 0,00020255 | NA          | 0,52288611 | -0,14000571 | 11 | -18971,602  | 37965,2187 | 128,801957 | 3,52E-15 |
| 1310 | -0,85074914 | 0,60334436 | NA         | 4,65E-05 | -0,00052401 | 0,40049867 | NA          | -1,96172815 | NA         | NA         | 0,00021146 | NA          | 0,48287384 | NA          | 9  | -18973,7695 | 37965,5489 | 129,132171 | 2,98E-15 |
| 2550 | -0,67953035 | 0,68234123 | NA         | 4,46E-05 | NA          | 0,41541375 | -0,13795142 | -2,55577604 | 0,44288659 | 0,01897716 | 0,00021141 | NA          | NA         | -0,08883356 | 11 | -18971,7849 | 37965,5844 | 129,1676   |          |

|      |             |            |             |          |             |            |             |             |            |            |            |             |            |             |    |             |            |            |          |
|------|-------------|------------|-------------|----------|-------------|------------|-------------|-------------|------------|------------|------------|-------------|------------|-------------|----|-------------|------------|------------|----------|
| 4008 | -1,05409025 | 0,78157333 | 0,00543311  | 4,44E-05 | NA          | NA         | -0,11273577 | -2,05206432 | NA         | 0,01786019 | 0,00020271 | -0,00039168 | 0,51529109 | -0,14768431 | 12 | -18972,4952 | 37969,0077 | 132,590972 | 5,29E-16 |
| 3040 | -1,28042467 | 0,61751101 | 0,00965662  | 4,55E-05 | -0,00054807 | 0,40424516 | NA          | -2,61719209 | 0,45517288 | 0,01892094 | 0,00021164 | 9,21E-05    | NA         | -0,08713002 | 13 | -18971,6648 | 37969,3497 | 132,932943 | 4,46E-16 |
| 1302 | -1,1987332  | 0,68175498 | NA          | 4,69E-05 | NA          | 0,40581671 | NA          | -1,96172815 | NA         | NA         | 0,00021146 | NA          | 0,48287384 | NA          | 8  | -18976,6833 | 37969,3747 | 132,957937 | 4,41E-16 |
| 1304 | -1,59179834 | 0,69737855 | 0,00852736  | 4,60E-05 | NA          | 0,40932129 | NA          | -1,96172815 | NA         | NA         | 0,00021146 | NA          | 0,48287384 | NA          | 9  | -18975,7669 | 37969,5438 | 133,127085 | 4,05E-18 |
| 3038 | -0,85074914 | 0,60334436 | NA          | 4,65E-05 | -0,00052401 | 0,40049867 | NA          | -2,61719209 | 0,45517288 | 0,01892094 | 0,00021164 | 9,21E-05    | NA         | -0,08713002 | 12 | -18972,8406 | 37969,6985 | 133,281736 | 3,75E-16 |
| 502  | -0,67953035 | 0,68234123 | NA          | 4,46E-05 | NA          | 0,41541375 | -0,13795142 | -2,87228819 | 0,44207022 | 0,01904584 | 0,00021405 | NA          | NA         | NA          | 10 | -18975,7391 | 37971,4904 | 135,073719 | 1,53E-16 |
| 3974 | -1,235734   | 0,76857786 | NA          | 4,69E-05 | NA          | NA         | NA          | -2,05206432 | NA         | 0,01786019 | 0,00020271 | -0,00039168 | 0,51529109 | -0,14768431 | 10 | -18975,7541 | 37971,5205 | 135,103745 | 1,51E-16 |
| 1373 | -0,31227401 | NA         | NA          | 4,32E-05 | -0,00145314 | 0,47935513 | NA          | -2,09152745 | 0,35956015 | NA         | 0,00022076 | NA          | 0,43622845 | NA          | 9  | -18976,9588 | 37971,9275 | 135,51078  | 1,23E-16 |
| 2518 | -1,1987332  | 0,68175498 | NA          | 4,69E-05 | NA          | 0,40581671 | NA          | -2,55577604 | 0,44288659 | 0,01897716 | 0,00021141 | NA          | NA         | -0,08883356 | 10 | -18975,96   | 37971,9322 | 135,515472 | 1,23E-16 |
| 504  | -1,04079715 | 0,69637088 | 0,00755047  | 4,39E-05 | NA          | 0,41816409 | -0,13461471 | -2,87228819 | 0,44207022 | 0,01904584 | 0,00021405 | NA          | NA         | NA          | 11 | -18975,0199 | 37972,0544 | 135,637662 | 1,15E-16 |
| 2520 | -1,59179834 | 0,69737855 | 0,00852736  | 4,60E-05 | NA          | 0,40932129 | NA          | -2,55577604 | 0,44288659 | 0,01897716 | 0,00021141 | NA          | NA         | -0,08883356 | 11 | -18975,0436 | 37972,1018 | 135,685064 | 1,13E-16 |
| 1885 | -0,31227401 | NA         | NA          | 4,32E-05 | -0,00145314 | 0,47935513 | NA          | -2,2103983  | 0,38500536 | NA         | 0,00022113 | 0,00018745  | 0,43806177 | NA          | 10 | -18976,0847 | 37972,1816 | 135,764871 | 1,08E-16 |
| 3976 | -1,52051301 | 0,78035551 | 0,00624724  | 4,63E-05 | NA          | NA         | NA          | -2,05206432 | NA         | 0,01786019 | 0,00020271 | -0,00039168 | 0,51529109 | -0,14768431 | 11 | -18975,2781 | 37972,5707 | 136,153997 | 8,92E-17 |
| 1014 | -0,67953035 | 0,68234123 | NA          | 4,46E-05 | NA          | 0,41541375 | -0,13795142 | -2,9468992  | 0,4586198  | 0,01897353 | 0,00021429 | 0,00012376  | NA         | NA          | 11 | -18975,3638 | 37972,7421 | 136,325395 | 8,18E-17 |
| 3470 | -0,8455927  | 0,67951403 | NA          | 4,64E-05 | -0,00057321 | NA         | NA          | -2,27275384 | NA         | 0,01711404 | 0,00020255 | NA          | 0,52288611 | -0,14000571 | 10 | -18976,6225 | 37973,2572 | 136,840468 | 6,33E-17 |
| 1016 | -1,04079715 | 0,69637088 | 0,00755047  | 4,39E-05 | NA          | 0,41816409 | -0,13461471 | -2,9468992  | 0,4586198  | 0,01897353 | 0,00021429 | 0,00012376  | NA         | NA          | 12 | -18974,6445 | 37973,3063 | 136,889559 | 6,17E-17 |
| 3030 | -1,1987332  | 0,68175498 | NA          | 4,69E-05 | NA          | 0,40581671 | NA          | -2,61719209 | 0,45517288 | 0,01892094 | 0,00021164 | 9,21E-05    | NA         | -0,08713002 | 11 | -18975,7545 | 37973,5236 | 137,106837 | 5,54E-17 |
| 480  | -1,28042467 | 0,61751101 | 0,00965662  | 4,55E-05 | -0,00054807 | 0,40424516 | NA          | -2,87228819 | 0,44207022 | 0,01904584 | 0,00021405 | NA          | NA         | NA          | 11 | -18975,8246 | 37973,6637 | 137,246992 | 5,16E-17 |
| 3032 | -1,59179834 | 0,69737855 | 0,00852736  | 4,60E-05 | NA          | 0,40932129 | NA          | -2,61719209 | 0,45517288 | 0,01892094 | 0,00021164 | 9,21E-05    | NA         | -0,08713002 | 12 | -18974,8381 | 37973,6934 | 137,27665  | 5,09E-17 |
| 1375 | -0,39160679 | NA         | 0,00183718  | 4,30E-05 | -0,00146197 | 0,48040455 | NA          | -2,09152745 | 0,35956015 | NA         | 0,00022076 | NA          | 0,43622845 | NA          | 10 | -18976,9154 | 37973,8429 | 137,42617  | 4,72E-17 |
| 3472 | -1,19738783 | 0,69098467 | 0,00751019  | 4,56E-05 | -0,00059207 | NA         | NA          | -2,27275384 | NA         | 0,01711404 | 0,00020255 | NA          | 0,52288611 | -0,14000571 | 11 | -18975,9326 | 37973,8797 | 137,463003 | 4,63E-18 |
| 478  | -0,85074914 | 0,60334436 | NA          | 4,65E-05 | -0,00052401 | 0,40049867 | NA          | -2,87228819 | 0,44207022 | 0,01904584 | 0,00021405 | NA          | NA         | NA          | 10 | -18977,0004 | 37974,0137 | 137,596229 | 4,33E-17 |
| 1887 | -0,39160679 | NA         | 0,00183718  | 4,30E-05 | -0,00146197 | 0,48040455 | NA          | -2,2103983  | 0,38500536 | NA         | 0,00022113 | 0,00018745  | 0,43806177 | NA          | 11 | -18976,0413 | 37974,0972 | 137,680483 | 4,16E-17 |
| 3494 | -0,79586264 | 0,77122371 | NA          | 4,50E-05 | NA          | NA         | -0,11503973 | -2,27275384 | NA         | 0,01711404 | 0,00020255 | NA          | 0,52288611 | -0,14000571 | 10 | -18977,1962 | 37974,4046 | 137,987897 | 3,56E-17 |
| 992  | -1,28042467 | 0,61751101 | 0,00965662  | 4,55E-05 | -0,00054807 | 0,40424516 | NA          | -2,9468992  | 0,4586198  | 0,01897353 | 0,00021429 | 0,00012376  | NA         | NA          | 12 | -18975,4492 | 37974,9156 | 138,498889 | 2,76E-17 |
| 990  | -0,85074914 | 0,60334436 | NA          | 4,65E-05 | -0,00052401 | 0,40049867 | NA          | -2,9468992  | 0,4586198  | 0,01897353 | 0,00021429 | 0,00012376  | NA         | NA          | 11 | -18976,625  | 37975,2646 | 138,847905 | 2,32E-17 |
| 3565 | 0,64576877  | NA         | NA          | 3,88E-05 | -0,00183092 | NA         | -0,20438761 | -2,59012234 | 0,38593256 | 0,02081194 | 0,00021148 | NA          | 0,47514204 | -0,138389   | 11 | -18976,6304 | 37975,2754 | 138,858633 | 2,31E-17 |
| 3496 | -1,05409025 | 0,78157333 | 0,00543311  | 4,44E-05 | NA          | NA         | -0,11273577 | -2,27275384 | NA         | 0,01711404 | 0,00020255 | NA          | 0,52288611 | -0,14000571 | 11 | -18976,8359 | 37975,6865 | 139,269754 | 1,88E-17 |
| 3573 | -0,84339357 | NA         | NA          | 4,07E-05 | NA          | 0,55505772 | -0,13640315 | -2,59012234 | 0,38593256 | 0,02081194 | 0,00021148 | NA          | 0,47514204 | -0,138389   | 11 | -18976,8886 | 37975,7918 | 139,375066 | 1,78E-18 |
| 3575 | -0,50593593 | NA         | -0,00700816 | 4,14E-05 | NA          | 0,55021643 | -0,14061875 | -2,59012234 | 0,38593256 | 0,02081194 | 0,00021148 | NA          | 0,47514204 | -0,138389   | 12 | -18976,2555 | 37976,5283 | 140,1116   | 1,23E-17 |
| 4077 | 0,64576877  | NA         | NA          | 3,88E-05 | -0,00183092 | NA         | -0,20438761 | -2,66976045 | 0,40191971 | 0,02073197 | 0,0002118  | 0,00011864  | 0,47565984 | -0,13600353 | 12 | -18976,2884 | 37976,594  | 140,177287 | 1,19E-17 |
| 4085 | -0,84339357 | NA         | NA          | 4,07E-05 | NA          | 0,55505772 | -0,13640315 | -2,66976045 | 0,40191971 | 0,02073197 | 0,0002118  | 0,00011864  | 0,47565984 | -0,13600353 | 12 | -18976,5466 | 37977,1104 | 140,69372  | 9,21E-18 |
| 3567 | 0,74969745  | NA         | -0,00245756 | 3,91E-05 | -0,00181949 | NA         | -0,20513804 | -2,59012234 | 0,38593256 | 0,02081194 | 0,00021148 | NA          | 0,47514204 | -0,138389   | 12 | -18976,5548 | 37977,1269 | 140,710139 | 9,14E-18 |
| 470  | -1,1987332  | 0,68175498 | NA          | 4,69E-05 | NA          | 0,40581671 | NA          | -2,87228819 | 0,44207022 | 0,01904584 | 0,00021405 | NA          | NA         | NA          | 9  | -18979,9143 | 37977,8385 | 141,421773 | 6,40E-19 |
| 4087 | -0,50593593 | NA         | -0,00700816 | 4,14E-05 | NA          | 0,55021643 | -0,14061875 | -2,66976045 | 0,40191971 | 0,02073197 | 0,0002118  | 0,00011864  | 0,47565984 | -0,13600353 | 13 | -18975,9135 | 37977,8472 | 141,430476 | 6,37E-18 |
| 472  | -1,59179834 | 0,69737855 | 0,00852736  | 4,60E-05 | NA          | 0,40932129 | NA          | -2,87228819 | 0,44207022 | 0,01904584 | 0,00021405 | NA          | NA         | NA          | 10 | -18978,9978 | 37978,0079 | 141,591143 | 5,88E-18 |
| 3462 | -1,235734   | 0,76857786 | NA          | 4,69E-05 | NA          | NA         | NA          | -2,27275384 | NA         | 0,01711404 | 0,00020255 | NA          | 0,52288611 | -0,14000571 | 9  | -18980,0949 | 37978,1997 | 141,78297  | 5,34E-18 |
| 1966 | -0,14195779 | 0,65649184 | NA          | 4,36E-05 | -0,00074998 | NA         | -0,15445798 | -2,58652225 | NA         | 0,01772679 | 0,00020696 | -0,00034396 | 0,48679163 | NA          | 11 | -18978,2071 | 37978,4288 | 142,012061 | 4,77E-18 |
| 4079 | 0,74969745  | NA         | -0,00245756 | 3,91E-05 | -0,00181949 | NA         | -0,20513804 | -2,66976045 | 0,40191971 | 0,02073197 | 0,0002118  | 0,00011864  | 0,47565984 | -0,13600353 | 13 | -18976,2128 | 37978,4457 | 142,029015 | 4,73E-18 |
| 982  | -1,1987332  | 0,68175498 | NA          | 4,69E-05 | NA          | 0,40581671 | NA          | -2,9468992  | 0,4586198  | 0,01897353 | 0,00021429 | 0,00012376  | NA         | NA          | 10 | -18979,5389 | 37979,0899 | 142,673228 | 3,42E-18 |
| 4029 | 0,65451489  | NA         | NA          | 3,95E-05 | -0,00164357 | 0,48762971 | -0,22170047 | -2,05206432 | NA         | 0,01786019 | 0,00020271 | -0,00039168 | 0,51529109 | -0,14768431 | 12 | -18977,5594 | 37979,1361 | 142,719365 | 3,35E-18 |
| 3464 | -1,52051301 | 0,78035551 | 0,00624724  | 4,63E-05 | NA          | NA         | NA          | -2,27275384 | NA         | 0,01711404 | 0,00020255 | NA          | 0,52288611 | -0,14000571 | 10 | -18979,6188 | 37979,2497 | 142,833    | 3,16E-18 |
| 984  | -1,59179834 | 0,69737855 | 0,00852736  | 4,60E-05 | NA          | 0,40932129 | NA          | -2,9468992  | 0,4586198  | 0,01897353 | 0,00021429 | 0,00012376  | NA         | NA          | 11 | -18978,6225 | 37979,2595 | 142,842819 | 3,15E-18 |
| 1968 | -0,45110821 | 0,66723944 | 0,00674107  | 4,29E-05 | -0,00076432 | NA         | -0,15224001 | -2,58652225 | NA         | 0,01772679 | 0,00020696 | -0,00034396 | 0,48679163 | NA          | 12 | -18977,6489 | 37979,3151 | 142,898395 | 3,06E-18 |
| 3541 | -1,36352414 | NA         | NA          | 4,29E-05 | NA          | 0,54467715 | NA          | -2,59012234 | 0,38593256 | 0,02081194 | 0,00021148 | NA          | 0,47514204 | -0,138389   | 10 | -18980,429  | 37980,8701 | 144,453391 | 1,41E-18 |
| 4031 | 0,61699723  | NA         | 0,00084798  | 3,94E-05 | -0,00164748 | 0,4880593  | -0,22142621 | -2,05206432 | NA         | 0,01786019 | 0,00020271 | -0,00039168 | 0,51529109 | -0,14768431 | 13 | -18977,5501 | 37981,1204 | 144,703653 | 1,24E-18 |
| 3886 | -0,14195779 | 0,65649184 | NA          | 4,36E-05 | -0,00074998 | NA         | -0,15445798 | -1,25486087 | NA         | NA         | 0,00020772 | -0,0003441  | 0,50313521 | -0,14558566 | 11 | -18979,5641 | 37981,1428 | 144,726076 | 1,23E-18 |
| 3543 | -1,08960867 | NA         | -0,00576757 | 4,36E-05 | NA          | 0,53973144 | NA          | -2,59012234 | 0,38593256 | 0,02081194 | 0,00021148 | NA          | 0,47514204 | -0,138389   | 11 | -18979,9967 | 37982,008  | 145,591248 | 7,96E-21 |
| 3888 | -0,45110821 | 0,66723944 | 0,00674107  | 4,29E-05 | -0,00076432 | NA         | -0,15224001 | -1,25486087 | NA         | NA         | 0,00020772 | -0,0003441  | 0,50313521 | -0,14558566 | 12 | -18979,0059 | 37982,0291 | 145,61241  | 7,88E-19 |
| 4053 | -1,36352414 | NA         | NA          | 4,29E-05 | NA          | 0,54467715 | NA          | -2,66976045 | 0,40191971 | 0,02073197 | 0,0002118  | 0,00011864  | 0,47565984 |             |    |             |            |            |          |

|      |             |            |             |          |             |            |             |             |            |            |            |             |            |             |    |             |            |            |          |
|------|-------------|------------|-------------|----------|-------------|------------|-------------|-------------|------------|------------|------------|-------------|------------|-------------|----|-------------|------------|------------|----------|
| 1936 | -1,17938783 | 0,69098467 | 0,00751019  | 4,56E-05 | -0,00059207 | NA         | NA          | -2,58652225 | NA         | 0,01772679 | 0,00020696 | -0,00034396 | 0,48679163 | NA          | 11 | -18982,5376 | 37987,0898 | 150,673107 | 6,27E-20 |
| 1958 | -0,79586264 | 0,77122371 | NA          | 4,50E-05 | NA          | NA         | -0,11503973 | -2,58652225 | NA         | 0,01772679 | 0,00020696 | -0,00034396 | 0,48679163 | NA          | 10 | -18983,8013 | 37987,6147 | 151,198    | 4,82E-20 |
| 3519 | 0,61699723  | NA         | 0,00084798  | 3,94E-05 | -0,00164748 | 0,4880593  | -0,22142621 | -2,27275384 | NA         | 0,01711404 | 0,00020255 | NA          | 0,52288611 | -0,14000571 | 12 | -18981,8908 | 37987,7989 | 151,382214 | 4,40E-20 |
| 1960 | -1,05409025 | 0,78157333 | 0,00543311  | 4,44E-05 | NA          | NA         | -0,11273577 | -2,58652225 | NA         | 0,01772679 | 0,00020696 | -0,00034396 | 0,48679163 | NA          | 11 | -18983,441  | 37988,8966 | 152,479858 | 2,54E-20 |
| 382  | -0,06671637 | 0,57575795 | NA          | 4,34E-05 | -0,00071955 | 0,41051829 | -0,17478186 | -1,97841134 | 0,41538406 | NA         | 0,00021885 | NA          | NA         | NA          | 10 | -18984,4709 | 37988,954  | 152,537283 | 2,47E-20 |
| 384  | -0,47166397 | 0,58945108 | 0,00876766  | 4,25E-05 | -0,00073797 | 0,4135805  | -0,1717464  | -1,97841134 | 0,41538406 | NA         | 0,00021885 | NA          | NA         | NA          | 11 | -18983,4967 | 37989,0081 | 152,59134  | 2,40E-20 |
| 3854 | -0,8455927  | 0,67951403 | NA          | 4,64E-05 | -0,00057321 | NA         | NA          | -1,25486087 | NA         | NA         | 0,00020772 | -0,0003441  | 0,50313521 | -0,14558566 | 10 | -18984,5846 | 37989,1813 | 152,764587 | 2,20E-20 |
| 3856 | -1,17938783 | 0,69098467 | 0,00751019  | 4,56E-05 | -0,00059207 | NA         | NA          | -1,25486087 | NA         | NA         | 0,00020772 | -0,0003441  | 0,50313521 | -0,14558566 | 11 | -18983,8946 | 37989,8038 | 153,387122 | 1,61E-20 |
| 3533 | -0,28011525 | NA         | NA          | 4,24E-05 | -0,0016491  | NA         | NA          | -2,59012234 | 0,38593256 | 0,02081194 | 0,00021148 | NA          | 0,47514204 | -0,138389   | 10 | -18984,9207 | 37989,8535 | 153,436811 | 1,57E-20 |
| 894  | -0,06671637 | 0,57575795 | NA          | 4,34E-05 | -0,00071955 | 0,41051829 | -0,17478186 | -2,0661368  | 0,43415925 | NA         | 0,00021911 | 0,00013912  | NA         | NA          | 11 | -18983,993  | 37990,0006 | 153,583854 | 1,46E-20 |
| 896  | -0,47166397 | 0,58945108 | 0,00876766  | 4,25E-05 | -0,00073797 | 0,4135805  | -0,1717464  | -2,0661368  | 0,43415925 | NA         | 0,00021911 | 0,00013912  | NA         | NA          | 12 | -18983,0188 | 37990,0549 | 153,638133 | 1,42E-20 |
| 3878 | -0,79586264 | 0,77122371 | NA          | 4,50E-05 | NA          | NA         | -0,11503973 | -1,25486087 | NA         | NA         | 0,00020772 | -0,0003441  | 0,50313521 | -0,14558566 | 10 | -18985,1583 | 37990,3287 | 153,912015 | 1,24E-20 |
| 4045 | -0,28011525 | NA         | NA          | 4,24E-05 | -0,0016491  | NA         | NA          | -2,66976045 | 0,40191971 | 0,02073197 | 0,0002118  | 0,00011864  | 0,47565984 | -0,13600353 | 11 | -18984,5787 | 37991,172  | 154,755243 | 8,15E-21 |
| 1422 | -0,8455927  | 0,67951403 | NA          | 4,64E-05 | -0,00057321 | NA         | NA          | -2,75826159 | NA         | 0,01709531 | 0,00020664 | NA          | 0,4949792  | NA          | 9  | -18986,616  | 37991,242  | 154,825273 | 7,87E-21 |
| 2422 | -0,67953035 | 0,68234123 | NA          | 4,46E-05 | NA          | 0,41541375 | -0,13795142 | -1,66433243 | 0,4162362  | NA         | 0,00021617 | NA          | NA         | -0,08904476 | 10 | -18985,6664 | 37991,345  | 154,928244 | 7,47E-21 |
| 1926 | -1,235734   | 0,76857786 | NA          | 4,69E-05 | NA          | NA         | NA          | -2,58652225 | NA         | 0,01772679 | 0,00020696 | -0,00034396 | 0,48679163 | NA          | 9  | -18986,6999 | 37991,4098 | 154,993073 | 7,23E-21 |
| 3880 | -1,05409025 | 0,78157333 | 0,00543311  | 4,44E-05 | NA          | NA         | -0,11273577 | -1,25486087 | NA         | NA         | 0,00020772 | -0,0003441  | 0,50313521 | -0,14558566 | 11 | -18984,798  | 37991,6106 | 155,193873 | 6,54E-21 |
| 3535 | -0,2131598  | NA         | -0,0015413  | 4,25E-05 | -0,00164139 | NA         | NA          | -2,59012234 | 0,38593256 | 0,02081194 | 0,00021148 | NA          | 0,47514204 | -0,138389   | 11 | -18984,891  | 37991,7966 | 155,379857 | 5,96E-21 |
| 1424 | -1,17938783 | 0,69098467 | 0,00751019  | 4,56E-05 | -0,00059207 | NA         | NA          | -2,75826159 | NA         | 0,01709531 | 0,00020664 | NA          | 0,4949792  | NA          | 10 | -18985,9261 | 37991,8643 | 155,447586 | 5,76E-23 |
| 2424 | -1,04079715 | 0,69637088 | 0,00755047  | 4,39E-05 | NA          | 0,41816409 | -0,13461471 | -1,66433243 | 0,4162362  | NA         | 0,00021617 | NA          | NA         | -0,08904476 | 11 | -18984,9472 | 37991,9089 | 155,492187 | 5,64E-21 |
| 1517 | 0,64576877  | NA         | NA          | 3,88E-05 | -0,00183092 | NA         | -0,20438761 | -3,07214819 | 0,38813022 | 0,02082345 | 0,00021556 | NA          | 0,44803127 | NA          | 10 | -18986,0844 | 37992,1809 | 155,764163 | 4,92E-21 |
| 1446 | -0,79586264 | 0,77122371 | NA          | 4,50E-05 | NA          | NA         | -0,11503973 | -2,75826159 | NA         | 0,01709531 | 0,00020664 | NA          | 0,4949792  | NA          | 9  | -18987,1897 | 37992,3894 | 155,972702 | 4,93E-21 |
| 1928 | -1,52051301 | 0,78035551 | 0,00624724  | 4,63E-05 | NA          | NA         | NA          | -2,58652225 | NA         | 0,01772679 | 0,00020696 | -0,00034396 | 0,48679163 | NA          | 10 | -18986,2238 | 37992,4598 | 156,043104 | 4,28E-21 |
| 1525 | -0,84339357 | NA         | NA          | 4,07E-05 | NA          | 0,55505772 | -0,13640315 | -3,07214819 | 0,38813022 | 0,02082345 | 0,00021556 | NA          | 0,44803127 | NA          | 11 | -18986,3426 | 37992,6973 | 156,280596 | 3,80E-21 |
| 2029 | 0,64576877  | NA         | NA          | 3,88E-05 | -0,00183092 | NA         | -0,20438761 | -3,17508673 | 0,41103069 | 0,02071909 | 0,00021591 | 0,0001702   | 0,4495725  | NA          | 11 | -18985,3695 | 37992,7536 | 156,336842 | 3,69E-21 |
| 2934 | -0,67953035 | 0,68234123 | NA          | 4,46E-05 | NA          | 0,41541375 | -0,13795142 | -1,73983563 | 0,43090563 | NA         | 0,00021643 | 0,00010896  | NA         | -0,08710954 | 11 | -18985,3767 | 37992,7679 | 156,351221 | 3,67E-21 |
| 4047 | -0,2131598  | NA         | -0,0015413  | 4,25E-05 | -0,00164139 | NA         | NA          | -2,66976045 | 0,40191971 | 0,02073197 | 0,0002118  | 0,00011864  | 0,47565984 | -0,13600353 | 12 | -18984,549  | 37993,1152 | 156,698511 | 3,08E-21 |
| 2037 | -0,84339357 | NA         | NA          | 4,07E-05 | NA          | 0,55505772 | -0,13640315 | -3,17508673 | 0,41103069 | 0,02071909 | 0,00021591 | 0,0001702   | 0,4495725  | NA          | 11 | -18985,6277 | 37993,27   | 156,853275 | 2,85E-21 |
| 2936 | -1,04079715 | 0,69637088 | 0,00755047  | 4,39E-05 | NA          | 0,41816409 | -0,13461471 | -1,73983563 | 0,43090563 | NA         | 0,00021643 | 0,00010896  | NA         | -0,08710954 | 12 | -18984,6574 | 37993,3321 | 156,915385 | 2,77E-22 |
| 1527 | -0,50593593 | NA         | -0,00700816 | 4,14E-05 | NA          | 0,55021643 | -0,14061875 | -3,07214819 | 0,38813022 | 0,02082345 | 0,00021556 | NA          | 0,44803127 | NA          | 11 | -18985,7095 | 37993,4336 | 157,016908 | 2,63E-21 |
| 2400 | -1,28042467 | 0,61751101 | 0,00965662  | 4,55E-05 | -0,00054807 | 0,40424516 | NA          | -1,66433243 | 0,4162362  | NA         | 0,00021617 | NA          | NA         | -0,08904476 | 11 | -18985,7518 | 37993,5182 | 157,101518 | 2,52E-21 |
| 1448 | -1,05409025 | 0,78157333 | 0,00543311  | 4,44E-05 | NA          | NA         | -0,11273577 | -2,75826159 | NA         | 0,01709531 | 0,00020664 | NA          | 0,4949792  | NA          | 10 | -18986,8294 | 37993,6711 | 157,254337 | 2,33E-21 |
| 2398 | -0,85074914 | 0,60334436 | NA          | 4,65E-05 | -0,00052401 | 0,40049867 | NA          | -1,66433243 | 0,4162362  | NA         | 0,00021617 | NA          | NA         | -0,08904476 | 10 | -18986,9277 | 37993,8675 | 157,450754 | 2,12E-21 |
| 3342 | -0,8455927  | 0,67951403 | NA          | 4,64E-05 | -0,00057321 | NA         | NA          | -1,4783871  | NA         | NA         | 0,00020739 | NA          | 0,51055393 | -0,13912561 | 9  | -18987,9785 | 37993,9669 | 157,550223 | 2,01E-21 |
| 2039 | -0,50593593 | NA         | -0,00700816 | 4,14E-05 | NA          | 0,55021643 | -0,14061875 | -3,17508673 | 0,41103069 | 0,02071909 | 0,00021591 | 0,0001702   | 0,4495725  | NA          | 12 | -18984,9946 | 37994,0065 | 157,589809 | 1,97E-21 |
| 1519 | 0,74969745  | NA         | -0,00245756 | 3,91E-05 | -0,00181949 | NA         | -0,20513804 | -3,07214819 | 0,38813022 | 0,02082345 | 0,00021556 | NA          | 0,44803127 | NA          | 11 | -18986,0088 | 37994,0322 | 157,615447 | 1,95E-21 |
| 3846 | -1,235734   | 0,76857786 | NA          | 4,69E-05 | NA          | NA         | NA          | -1,25486087 | NA         | NA         | 0,00020772 | -0,0003441  | 0,50313521 | -0,14558566 | 9  | -18988,0569 | 37994,1238 | 157,707088 | 1,86E-21 |
| 3344 | -1,17938783 | 0,69098467 | 0,00751019  | 4,56E-05 | -0,00059207 | NA         | NA          | -1,4783871  | NA         | NA         | 0,00020739 | NA          | 0,51055393 | -0,13912561 | 10 | -18987,2885 | 37994,5893 | 158,172536 | 1,48E-21 |
| 2031 | 0,74969745  | NA         | -0,00245756 | 3,91E-05 | -0,00181949 | NA         | -0,20513804 | -3,17508673 | 0,41103069 | 0,02071909 | 0,00021591 | 0,0001702   | 0,4495725  | NA          | 12 | -18985,2939 | 37994,6051 | 158,188348 | 1,46E-21 |
| 2912 | -1,28042467 | 0,61751101 | 0,00965662  | 4,55E-05 | -0,00054807 | 0,40424516 | NA          | -1,73983563 | 0,43090563 | NA         | 0,00021643 | 0,00010896  | NA         | -0,08710954 | 12 | -18985,4621 | 37994,9414 | 158,524715 | 1,24E-21 |
| 3366 | -0,79586264 | 0,77122371 | NA          | 4,50E-05 | NA          | NA         | -0,11503973 | -1,4783871  | NA         | NA         | 0,00020739 | NA          | 0,51055393 | -0,13912561 | 9  | -18988,5522 | 37995,1144 | 158,697651 | 1,13E-21 |
| 3848 | -1,52051301 | 0,78035551 | 0,00624724  | 4,63E-05 | NA          | NA         | NA          | -1,25486087 | NA         | NA         | 0,00020772 | -0,0003441  | 0,50313521 | -0,14558566 | 10 | -18987,5808 | 37995,1738 | 158,757118 | 1,10E-21 |
| 2910 | -0,85074914 | 0,60334436 | NA          | 4,65E-05 | -0,00052401 | 0,40049867 | NA          | -1,73983563 | 0,43090563 | NA         | 0,00021643 | 0,00010896  | NA         | -0,08710954 | 11 | -18986,6379 | 37995,2905 | 158,87373  | 1,04E-21 |
| 1414 | -1,235734   | 0,76857786 | NA          | 4,69E-05 | NA          | NA         | NA          | -2,75826159 | NA         | 0,01709531 | 0,00020664 | NA          | 0,4949792  | NA          | 8  | -18990,0884 | 37996,1847 | 159,767996 | 6,64E-22 |
| 3368 | -1,05409025 | 0,78157333 | 0,00543311  | 4,44E-05 | NA          | NA         | -0,11273577 | -1,4783871  | NA         | NA         | 0,00020739 | NA          | 0,51055393 | -0,13912561 | 10 | -18988,1919 | 37996,396  | 159,979287 | 5,98E-22 |
| 3997 | -0,31227401 | NA         | NA          | 4,31E-05 | -0,00145314 | 0,47935513 | NA          | -2,05206432 | NA         | 0,01786019 | 0,00020271 | -0,00039168 | 0,5129109  | -0,14768431 | 11 | -18987,4623 | 37996,9391 | 160,522403 | 4,56E-22 |
| 1416 | -1,52051301 | 0,78035551 | 0,00624724  | 4,63E-05 | NA          | NA         | NA          | -2,75826159 | NA         | 0,01709531 | 0,00020664 | NA          | 0,4949792  | NA          | 9  | -18989,6123 | 37997,2345 | 160,817805 | 3,93E-22 |
| 374  | -0,67953035 | 0,68234123 | NA          | 4,46E-05 | NA          | 0,41541375 | -0,13795142 | -1,97841134 | 0,41538406 | NA         | 0,00021885 | NA          | NA         | NA          | 9  | -18989,6575 | 37997,325  | 160,908296 | 3,76E-22 |
| 2390 | -1,1987332  | 0,68175498 | NA          | 4,69E-05 | NA          | 0,40581671 | NA          | -1,66433243 | 0,4162362  | NA         | 0,00021617 | NA          | NA         | -0,08904476 | 9  | -18989,8415 | 37997,693  | 161,276299 | 3,13E-22 |
| 1493 | -1,36352414 | NA         | NA          | 4,29E-05 | NA          | 0,54467715 | NA          | -3,07214819 | 0,38813022 | 0,02082345 | 0,00021556 | NA          | 0,44803127 | NA          | 9  | -18989,8829 | 37997,7759 | 161,359142 | 3,00E-22 |
| 2392 | -1,59179834 | 0,69737855 | 0,00852736  | 4,60E-05 | NA          | 0,40932129 | NA          | -1,66433243 | 0,4162362  | NA         | 0,00021617 | NA          | NA         | -0,08904476 | 10 |             |            |            |          |

|      |             |            |             |          |             |            |             |             |            |            |            |             |            |             |    |             |            |            |          |
|------|-------------|------------|-------------|----------|-------------|------------|-------------|-------------|------------|------------|------------|-------------|------------|-------------|----|-------------|------------|------------|----------|
| 2007 | -1,08960867 | NA         | -0,00576757 | 4,36E-05 | NA          | 0,53973144 | NA          | -3,17508673 | 0,41103069 | 0,02071909 | 0,00021591 | 0,0001702   | 0,4495725  | NA          | 11 | -18988,7358 | 37999,4862 | 163,069457 | 1,28E-22 |
| 352  | -1,28042467 | 0,61751101 | 0,00965662  | 4,55E-05 | -0,00054807 | 0,40424516 | NA          | -1,97841134 | 0,41538406 | NA         | 0,00021885 | NA          | NA         | NA          | 10 | -18989,743  | 37999,4981 | 163,081348 | 1,27E-22 |
| 350  | -0,85074914 | 0,60334436 | NA          | 4,65E-05 | -0,00052401 | 0,40049867 | NA          | -1,97841134 | 0,41538406 | NA         | 0,00021885 | NA          | NA         | NA          | 9  | -18990,9188 | 37999,8475 | 163,430806 | 1,06E-22 |
| 3336 | -1,52051301 | 0,78035551 | 0,00624724  | 4,63E-05 | NA          | NA         | NA          | -1,4783871  | NA         | NA         | 0,00020739 | NA          | 0,51055393 | -0,13912561 | 9  | -18990,9748 | 37999,9595 | 163,542755 | 1,01E-22 |
| 1838 | -0,14195779 | 0,65649184 | NA          | 4,36E-05 | -0,00074998 | NA         | -0,15445798 | -1,78635429 | NA         | NA         | 0,0002119  | -0,00029974 | 0,47515083 | NA          | 10 | -18990,2459 | 38000,5039 | 164,087198 | 7,67E-23 |
| 864  | -1,28042467 | 0,61751101 | 0,00965662  | 4,55E-05 | -0,00054807 | 0,40424516 | NA          | -2,0661368  | 0,43415925 | NA         | 0,00021911 | 0,00013912  | NA         | NA          | 11 | -18989,265  | 38000,5446 | 164,127919 | 7,51E-23 |
| 862  | -0,85074914 | 0,60334436 | NA          | 4,65E-05 | -0,00052401 | 0,40049867 | NA          | -2,0661368  | 0,43415925 | NA         | 0,00021911 | 0,00013912  | NA         | NA          | 10 | -18990,4409 | 38000,8939 | 164,477155 | 6,31E-23 |
| 1983 | 0,61699723  | NA         | 0,00084798  | 3,94E-05 | -0,00164748 | 0,4880593  | -0,22142621 | -2,58652225 | NA         | 0,01772679 | 0,00020696 | -0,00034396 | 0,48679163 | NA          | 12 | -18988,4959 | 38001,0099 | 164,592317 | 5,95E-23 |
| 1840 | -0,45110821 | 0,66723944 | 0,00674107  | 4,29E-05 | -0,00076432 | NA         | -0,15224001 | -1,78635429 | NA         | NA         | 0,0002119  | -0,00029974 | 0,47515083 | NA          | 11 | -18989,6877 | 38001,39   | 164,973311 | 4,92E-23 |
| 3901 | 0,65451489  | NA         | NA          | 3,95E-05 | -0,00164357 | 0,48762971 | -0,22170047 | -1,25486087 | NA         | NA         | 0,00020772 | -0,0003441  | 0,50313521 | -0,14558566 | 11 | -18989,8622 | 38001,739  | 165,322265 | 4,13E-23 |
| 3485 | -0,31227401 | NA         | NA          | 4,32E-05 | -0,00145314 | 0,47935513 | NA          | -2,27275384 | NA         | 0,01711404 | 0,00020255 | NA          | 0,52288611 | -0,14000571 | 10 | -18991,803  | 38003,6181 | 167,201406 | 1,62E-23 |
| 342  | -1,1987332  | 0,68175498 | NA          | 4,69E-05 | NA          | 0,40581671 | NA          | -1,97841134 | 0,41538406 | NA         | 0,00021885 | NA          | NA         | NA          | 8  | -18993,8327 | 38003,6733 | 167,256572 | 1,57E-23 |
| 1326 | -0,14195779 | 0,65649184 | NA          | 4,36E-05 | -0,00074998 | NA         | -0,15445798 | -1,96172815 | NA         | NA         | 0,00021146 | NA          | 0,48287384 | NA          | 9  | -18992,8508 | 38003,7115 | 167,294771 | 1,54E-23 |
| 3903 | 0,61699723  | NA         | 0,00084798  | 3,94E-05 | -0,00164748 | 0,4880593  | -0,22142621 | -1,25486087 | NA         | NA         | 0,00020772 | -0,0003441  | 0,50313521 | -0,14558566 | 12 | -18989,8529 | 38003,7231 | 167,306332 | 1,53E-23 |
| 1469 | 0,65451489  | NA         | NA          | 3,95E-05 | -0,00164357 | 0,48762971 | -0,22170047 | -2,75826159 | NA         | 0,01709531 | 0,00020664 | NA          | 0,4949792  | NA          | 10 | -18991,8936 | 38003,7995 | 167,38273  | 1,48E-23 |
| 344  | -1,59179834 | 0,69737855 | 0,00852736  | 4,60E-05 | NA          | 0,40932129 | NA          | -1,97841134 | 0,41538406 | NA         | 0,00021885 | NA          | NA         | NA          | 9  | -18992,9162 | 38003,8424 | 167,42572  | 1,44E-23 |
| 1328 | -0,45110821 | 0,66723944 | 0,00674107  | 4,29E-05 | -0,00076432 | NA         | -0,15224001 | -1,96172815 | NA         | NA         | 0,00021146 | NA          | 0,48287384 | NA          | 10 | -18992,2926 | 38004,5974 | 168,180663 | 9,90E-24 |
| 854  | -1,1987332  | 0,68175498 | NA          | 4,69E-05 | NA          | 0,40581671 | NA          | -2,0661368  | 0,43415925 | NA         | 0,00021911 | 0,00013912  | NA         | NA          | 9  | -18993,3547 | 38004,7194 | 168,3027   | 9,31E-24 |
| 856  | -1,59179834 | 0,69737855 | 0,00852736  | 4,60E-05 | NA          | 0,40932129 | NA          | -2,0661368  | 0,43415925 | NA         | 0,00021911 | 0,00013912  | NA         | NA          | 10 | -18992,4383 | 38004,8888 | 168,472069 | 8,56E-24 |
| 3487 | -0,39160679 | NA         | 0,00183718  | 4,30E-05 | -0,00146197 | 0,48040455 | NA          | -2,27275384 | NA         | 0,01711404 | 0,00020255 | NA          | 0,52288611 | -0,14000571 | 11 | -18991,7596 | 38005,5337 | 169,117018 | 6,20E-24 |
| 1471 | 0,61699723  | NA         | 0,00084798  | 3,94E-05 | -0,00164748 | 0,4880593  | -0,22142621 | -2,75826159 | NA         | 0,01709531 | 0,00020664 | NA          | 0,4949792  | NA          | 11 | -18991,8843 | 38005,7833 | 169,366575 | 5,47E-24 |
| 2542 | -0,14195779 | 0,65649184 | NA          | 4,36E-05 | -0,00074998 | NA         | -0,15445798 | -2,55577604 | 0,44288659 | 0,01897716 | 0,00021141 | NA          | NA         | -0,08883356 | 11 | -18992,1274 | 38006,2693 | 169,85275  | 4,29E-24 |
| 3389 | 0,65451489  | NA         | NA          | 3,95E-05 | -0,00164357 | 0,48762971 | -0,22170047 | -1,4783871  | NA         | NA         | 0,00020739 | NA          | 0,51055393 | -0,13912561 | 10 | -18993,2561 | 38006,5244 | 170,10768  | 3,78E-25 |
| 3437 | 0,64576877  | NA         | NA          | 3,88E-05 | -0,00183092 | NA         | -0,20438761 | -1,61349146 | 0,35721774 | NA         | 0,00021669 | NA          | 0,46315983 | -0,13737061 | 10 | -18993,2985 | 38006,6091 | 170,19237  | 3,62E-24 |
| 1485 | -0,28011525 | NA         | NA          | 4,24E-05 | -0,0016491  | NA         | NA          | -3,07214819 | 0,38813022 | 0,02082345 | 0,00021556 | NA          | 0,44803127 | NA          | 9  | -18994,3747 | 38006,7593 | 170,342562 | 3,36E-24 |
| 3445 | -0,84339357 | NA         | NA          | 4,07E-05 | NA          | 0,55505772 | -0,13640315 | -1,61349146 | 0,35721774 | NA         | 0,00021669 | NA          | 0,46315983 | -0,13737061 | 10 | -18993,5567 | 38007,1255 | 170,708803 | 2,80E-24 |
| 2544 | -0,45110821 | 0,66723944 | 0,00674107  | 4,29E-05 | -0,00076432 | NA         | -0,15224001 | -2,55577604 | 0,44288659 | 0,01897716 | 0,00021141 | NA          | NA         | -0,08883356 | 12 | -18991,5693 | 38007,1558 | 170,739085 | 2,75E-24 |
| 1997 | -0,28011525 | NA         | NA          | 4,24E-05 | -0,0016491  | NA         | NA          | -3,17508673 | 0,41103069 | 0,02071909 | 0,00021591 | 0,0001702   | 0,4495725  | NA          | 10 | -18993,6598 | 38007,3317 | 170,91502  | 2,52E-24 |
| 3949 | 0,64576877  | NA         | NA          | 3,88E-05 | -0,00183092 | NA         | -0,20438761 | -1,71083893 | 0,37612338 | NA         | 0,00021703 | 0,00013898  | 0,46389079 | -0,13469622 | 11 | -18992,8252 | 38007,665  | 171,248303 | 2,14E-24 |
| 3054 | -0,14195779 | 0,65649184 | NA          | 4,36E-05 | -0,00074998 | NA         | -0,15445798 | -2,61719209 | 0,45517288 | 0,01892094 | 0,00021164 | 9,21E-05    | NA         | -0,08713002 | 12 | -18991,9219 | 38007,8611 | 171,444336 | 1,94E-24 |
| 3447 | -0,50593593 | NA         | -0,00700816 | 4,14E-05 | NA          | 0,55021643 | -0,14061875 | -1,61349146 | 0,35721774 | NA         | 0,00021669 | NA          | 0,46315983 | -0,13737061 | 11 | -18992,9236 | 38007,8618 | 171,445115 | 1,94E-24 |
| 3957 | -0,84339357 | NA         | NA          | 4,07E-05 | NA          | 0,55505772 | -0,13640315 | -1,71083893 | 0,37612338 | NA         | 0,00021703 | 0,00013898  | 0,46389079 | -0,13469622 | 11 | -18993,0834 | 38008,1815 | 171,764735 | 1,65E-24 |
| 3439 | 0,74969745  | NA         | -0,00245756 | 3,91E-05 | -0,00181949 | NA         | -0,20513804 | -1,61349146 | 0,35721774 | NA         | 0,00021669 | NA          | 0,46315983 | -0,13737061 | 11 | -18993,2229 | 38008,4604 | 172,043655 | 1,43E-24 |
| 3391 | 0,61699723  | NA         | 0,00084798  | 3,94E-05 | -0,00164748 | 0,4880593  | -0,22142621 | -1,4783871  | NA         | NA         | 0,00020739 | NA          | 0,51055393 | -0,13912561 | 11 | -18993,2468 | 38008,5082 | 172,091525 | 1,40E-24 |
| 1806 | -0,8455927  | 0,67951403 | NA          | 4,64E-05 | -0,00057321 | NA         | NA          | -1,78635429 | NA         | NA         | 0,0002119  | -0,00029974 | 0,47515083 | NA          | 9  | -18995,2663 | 38008,5427 | 172,125931 | 1,38E-25 |
| 1487 | -0,2131598  | NA         | -0,0015413  | 4,25E-05 | -0,00164139 | NA         | NA          | -3,07214819 | 0,38813022 | 0,02082345 | 0,00021556 | NA          | 0,44803127 | NA          | 10 | -18994,345  | 38008,7021 | 172,285387 | 1,27E-24 |
| 3056 | -0,45110821 | 0,66723944 | 0,00674107  | 4,29E-05 | -0,00076432 | NA         | -0,15224001 | -2,61719209 | 0,45517288 | 0,01892094 | 0,00021164 | 9,21E-05    | NA         | -0,08713002 | 13 | -18991,3637 | 38008,7476 | 172,330892 | 1,24E-24 |
| 3959 | -0,50593593 | NA         | -0,00700816 | 4,14E-05 | NA          | 0,55021643 | -0,14061875 | -1,71083893 | 0,37612338 | NA         | 0,00021703 | 0,00013898  | 0,46389079 | -0,13469622 | 12 | -18992,4504 | 38008,918  | 172,501269 | 1,14E-24 |
| 1808 | -1,17938783 | 0,69098467 | 0,00751019  | 4,56E-05 | -0,00059207 | NA         | NA          | -1,78635429 | NA         | NA         | 0,0002119  | -0,00029974 | 0,47515083 | NA          | 10 | -18994,5764 | 38009,165  | 172,748244 | 1,01E-24 |
| 1999 | -0,2131598  | NA         | -0,0015413  | 4,25E-05 | -0,00164139 | NA         | NA          | -3,17508673 | 0,41103069 | 0,02071909 | 0,00021591 | 0,0001702   | 0,4495725  | NA          | 11 | -18993,6301 | 38009,2748 | 172,858066 | 9,55E-25 |
| 3951 | 0,74969745  | NA         | -0,00245756 | 3,91E-05 | -0,00181949 | NA         | -0,20513804 | -1,71083893 | 0,37612338 | NA         | 0,00021703 | 0,00013898  | 0,46389079 | -0,13469622 | 12 | -18992,7496 | 38009,5165 | 173,099809 | 8,46E-25 |
| 1830 | -0,79586264 | 0,77122371 | NA          | 4,50E-05 | NA          | NA         | -0,11503973 | -1,78635429 | NA         | NA         | 0,0002119  | -0,00029974 | 0,47515083 | NA          | 9  | -18995,8401 | 38009,6901 | 173,273359 | 7,76E-25 |
| 1832 | -1,05409025 | 0,78157333 | 0,00543311  | 4,44E-05 | NA          | NA         | -0,11273577 | -1,78635429 | NA         | NA         | 0,0002119  | -0,00029974 | 0,47515083 | NA          | 10 | -18995,4798 | 38010,9717 | 174,554995 | 4,09E-25 |
| 1294 | -0,8455927  | 0,67951403 | NA          | 4,64E-05 | -0,00057321 | NA         | NA          | -1,96172815 | NA         | NA         | 0,00021146 | NA          | 0,48287384 | NA          | 8  | -18997,8712 | 38011,7504 | 175,333726 | 2,77E-25 |
| 494  | -0,14195779 | 0,65649184 | NA          | 4,36E-05 | -0,00074998 | NA         | -0,15445798 | -2,87228819 | 0,44207022 | 0,01904584 | 0,00021405 | NA          | NA         | NA          | 10 | -18996,0817 | 38012,1756 | 175,758829 | 2,24E-25 |
| 3413 | -1,36352414 | NA         | NA          | 4,29E-05 | NA          | 0,54467715 | NA          | -1,61349146 | 0,35721774 | NA         | 0,00021669 | NA          | 0,46315983 | -0,13737061 | 9  | -18997,0971 | 38012,2041 | 175,78735  | 2,21E-25 |
| 1296 | -1,17938783 | 0,69098467 | 0,00751019  | 4,56E-05 | -0,00059207 | NA         | NA          | -1,96172815 | NA         | NA         | 0,00021146 | NA          | 0,48287384 | NA          | 9  | -18997,1813 | 38012,3725 | 175,955817 | 2,03E-25 |
| 1318 | -0,79586264 | 0,77122371 | NA          | 4,50E-05 | NA          | NA         | -0,11503973 | -1,96172815 | NA         | NA         | 0,00021146 | NA          | 0,48287384 | NA          | 8  | -18998,445  | 38012,8979 | 176,481154 | 1,56E-25 |
| 496  | -0,45110821 | 0,66723944 | 0,00674107  | 4,29E-05 | -0,00076432 | NA         | -0,15224001 | -2,87228819 | 0,44207022 | 0,01904584 | 0,00021405 | NA          | NA         | NA          | 11 | -18995,5235 | 38013,0617 | 176,644942 | 1,44E-25 |
| 3925 | -1,36352414 | NA         | NA          | 4,29E-05 | NA          | 0,54467715 | NA          | -1,71083893 | 0,37612338 | NA         | 0,00021703 | 0,00013898  | 0,46389079 | -0,13469622 | 10 | -18996,6238 | 38013,2598 | 176,843061 | 1,30E-25 |
| 3415 | -1,08960867 | NA         | -0,00576757 | 4,36E-05 | NA          | 0,53973144 | NA          | -1,61349146 | 0,35721774 | NA         | 0,00021669 | NA          | 0,46315983 | -0,13737061 | 10 | -18996,6648 | 38013,3417 | 176,924984 |          |

|      |             |            |             |          |             |            |             |             |            |            |            |             |            |             |    |             |            |            |          |
|------|-------------|------------|-------------|----------|-------------|------------|-------------|-------------|------------|------------|------------|-------------|------------|-------------|----|-------------|------------|------------|----------|
| 3024 | -1,17938783 | 0,69098467 | 0,00751019  | 4,56E-05 | -0,00059207 | NA         | NA          | -2,61719209 | 0,45517288 | 0,01892094 | 0,00021164 | 9,21E-05    | NA         | -0,08713002 | 12 | -18996,2524 | 38016,5221 | 180,105382 | 2,55E-26 |
| 1286 | -1,235734   | 0,76857786 | NA          | 4,69E-05 | NA          | NA         | NA          | -1,96172815 | NA         | NA         | 0,00021146 | NA          | 0,48287384 | NA          | 7  | -19001,3436 | 38016,6934 | 180,27667  | 2,34E-26 |
| 2536 | -1,05409025 | 0,78157333 | 0,00543311  | 4,44E-05 | NA          | NA         | -0,11273577 | -2,55577604 | 0,44288659 | 0,01897716 | 0,00021141 | NA          | NA         | -0,08883356 | 11 | -18997,3613 | 38016,7373 | 180,320547 | 2,29E-26 |
| 1949 | -0,31227401 | NA         | NA          | 4,32E-05 | -0,00145314 | 0,47935513 | NA          | -2,58652225 | NA         | 0,01772679 | 0,00020696 | -0,00034396 | 0,48679163 | NA          | 10 | -18998,408  | 38016,8282 | 180,411509 | 2,19E-26 |
| 3046 | -0,79586264 | 0,77122371 | NA          | 4,50E-05 | NA          | NA         | -0,11503973 | -2,61719209 | 0,45517288 | 0,01892094 | 0,00021164 | 9,21E-05    | NA         | -0,08713002 | 11 | -18997,5161 | 38017,0468 | 180,630054 | 1,96E-26 |
| 1288 | -1,52051301 | 0,78035551 | 0,00624724  | 4,63E-05 | NA          | NA         | NA          | -1,96172815 | NA         | NA         | 0,00021146 | NA          | 0,48287384 | NA          | 8  | -19000,8675 | 38017,743  | 181,326257 | 1,38E-26 |
| 3048 | -1,05409025 | 0,78157333 | 0,00543311  | 4,44E-05 | NA          | NA         | -0,11273577 | -2,61719209 | 0,45517288 | 0,01892094 | 0,00021164 | 9,21E-05    | NA         | -0,08713002 | 12 | -18997,1558 | 38018,3289 | 181,912133 | 1,03E-26 |
| 1951 | -0,39160679 | NA         | 0,00183718  | 4,30E-05 | -0,00146197 | 0,48040455 | NA          | -2,58652225 | NA         | 0,01772679 | 0,00020696 | -0,00034396 | 0,48679163 | NA          | 11 | -18998,3646 | 38018,7438 | 182,327121 | 8,39E-27 |
| 2502 | -1,235734   | 0,76857786 | NA          | 4,69E-05 | NA          | NA         | NA          | -2,55577604 | 0,44288659 | 0,01897716 | 0,00021141 | NA          | NA         | -0,08883356 | 9  | -19000,6203 | 38019,2505 | 182,833763 | 6,51E-27 |
| 3869 | -0,31227401 | NA         | NA          | 4,32E-05 | -0,00145314 | 0,47935513 | NA          | -1,25486087 | NA         | NA         | 0,00020772 | -0,0003441  | 0,50313521 | -0,14558566 | 10 | -18999,765  | 38019,5422 | 183,125524 | 5,63E-27 |
| 462  | -0,8455927  | 0,67951403 | NA          | 4,64E-05 | -0,00057321 | NA         | NA          | -2,87228819 | 0,44207022 | 0,01904584 | 0,00021405 | NA          | NA         | NA          | 9  | -19001,1022 | 38020,2143 | 183,797562 | 4,02E-27 |
| 2504 | -1,52051301 | 0,78035551 | 0,00624724  | 4,63E-05 | NA          | NA         | NA          | -2,55577604 | 0,44288659 | 0,01897716 | 0,00021141 | NA          | NA         | -0,08883356 | 10 | -19000,1442 | 38020,3005 | 183,883793 | 3,85E-27 |
| 464  | -1,17938783 | 0,69098467 | 0,00751019  | 4,56E-05 | -0,00059207 | NA         | NA          | -2,87228819 | 0,44207022 | 0,01904584 | 0,00021405 | NA          | NA         | NA          | 10 | -19000,4122 | 38020,8366 | 184,419875 | 2,95E-27 |
| 3014 | -1,235734   | 0,76857786 | NA          | 4,69E-05 | NA          | NA         | NA          | -2,61719209 | 0,45517288 | 0,01892094 | 0,00021164 | 9,21E-05    | NA         | -0,08713002 | 10 | -19000,4147 | 38020,8416 | 184,424905 | 2,94E-27 |
| 1853 | 0,65451489  | NA         | NA          | 3,95E-05 | -0,00164357 | 0,48762971 | -0,22170047 | -1,78635429 | NA         | NA         | 0,00021119 | -0,00029974 | 0,47515083 | NA          | 10 | -19000,544  | 38021,1001 | 184,683387 | 2,58E-27 |
| 3405 | -0,28011525 | NA         | NA          | 4,24E-05 | -0,0016491  | NA         | NA          | -1,61349146 | 0,35721774 | NA         | 0,00021669 | NA          | 0,46315983 | -0,13737061 | 9  | -19001,5888 | 38021,1875 | 184,770769 | 2,47E-27 |
| 486  | -0,79586264 | 0,77122371 | NA          | 4,50E-05 | NA          | NA         | -0,11503973 | -2,87228819 | 0,44207022 | 0,01904584 | 0,00021405 | NA          | NA         | NA          | 9  | -19001,6759 | 38021,3617 | 184,94499  | 2,27E-27 |
| 3871 | -0,39160679 | NA         | 0,00183718  | 4,30E-05 | -0,00146197 | 0,48040455 | NA          | -1,25486087 | NA         | NA         | 0,00020772 | -0,0003441  | 0,50313521 | -0,14558566 | 11 | -18999,7216 | 38021,4579 | 185,041136 | 2,16E-27 |
| 974  | -0,8455927  | 0,67951403 | NA          | 4,64E-05 | -0,00057321 | NA         | NA          | -2,9468992  | 0,4586198  | 0,01897353 | 0,00021429 | 0,00012376  | NA         | NA          | 10 | -19000,7268 | 38021,4657 | 185,049016 | 2,15E-27 |
| 1437 | -0,31227401 | NA         | NA          | 4,32E-05 | -0,00145314 | 0,47935513 | NA          | -2,75826159 | NA         | 0,01709531 | 0,00020664 | NA          | 0,4949792  | NA          | 9  | -19001,7965 | 38021,6029 | 185,18621  | 2,01E-28 |
| 3016 | -1,52051301 | 0,78035551 | 0,00624724  | 4,63E-05 | NA          | NA         | NA          | -2,61719209 | 0,45517288 | 0,01892094 | 0,00021164 | 9,21E-05    | NA         | -0,08713002 | 11 | -18999,9386 | 38021,8919 | 185,475157 | 1,74E-27 |
| 976  | -1,17938783 | 0,69098467 | 0,00751019  | 4,56E-05 | -0,00059207 | NA         | NA          | -2,9468992  | 0,4586198  | 0,01897353 | 0,00021429 | 0,00012376  | NA         | NA          | 11 | -19000,0368 | 38022,0883 | 185,671551 | 1,58E-27 |
| 3917 | -0,28011525 | NA         | NA          | 4,24E-05 | -0,0016491  | NA         | NA          | -1,71083893 | 0,37612338 | NA         | 0,00021703 | 0,00013898  | 0,46389079 | -0,13469622 | 10 | -19001,1155 | 38022,2432 | 185,82648  | 1,46E-27 |
| 998  | -0,79586264 | 0,77122371 | NA          | 4,50E-05 | NA          | NA         | -0,11503973 | -2,9468992  | 0,4586198  | 0,01897353 | 0,00021429 | 0,00012376  | NA         | NA          | 10 | -19001,3005 | 38022,6132 | 186,196445 | 1,21E-27 |
| 488  | -1,05409025 | 0,78157333 | 0,00543311  | 4,44E-05 | NA          | NA         | -0,11273577 | -2,87228819 | 0,44207022 | 0,01904584 | 0,00021405 | NA          | NA         | NA          | 10 | -19001,3156 | 38022,6433 | 186,226626 | 1,19E-27 |
| 1855 | 0,61699723  | NA         | 0,00084798  | 3,94E-05 | -0,00164748 | 0,4880593  | -0,22142621 | -1,78635429 | NA         | NA         | 0,00021119 | -0,00029974 | 0,47515083 | NA          | 11 | -19000,5347 | 38023,084  | 186,667232 | 9,58E-28 |
| 3407 | -0,2131598  | NA         | -0,0015413  | 4,25E-05 | -0,00164139 | NA         | NA          | -1,61349146 | 0,35721774 | NA         | 0,00021669 | NA          | 0,46315983 | -0,13737061 | 10 | -19001,5591 | 38023,1303 | 186,713594 | 9,36E-28 |
| 1389 | 0,64576877  | NA         | NA          | 3,88E-05 | -0,00183092 | NA         | -0,20438761 | -2,09152745 | 0,35956015 | NA         | 0,00022076 | NA          | 0,43622845 | NA          | 9  | -19002,6607 | 38023,3314 | 186,914728 | 8,46E-28 |
| 1439 | -0,39160679 | NA         | 0,00183718  | 4,30E-05 | -0,00146197 | 0,48040455 | NA          | -2,75826159 | NA         | 0,01709531 | 0,00020664 | NA          | 0,4949792  | NA          | 10 | -19001,7531 | 38023,5183 | 187,101601 | 7,71E-28 |
| 1901 | 0,64576877  | NA         | NA          | 3,88E-05 | -0,00183092 | NA         | -0,20438761 | -2,2103983  | 0,38500536 | NA         | 0,00022113 | 0,00018745  | 0,43806177 | NA          | 10 | -19001,7867 | 38023,5855 | 187,168819 | 7,45E-29 |
| 1397 | -0,84339357 | NA         | NA          | 4,07E-05 | NA          | 0,55505772 | -0,13640315 | -2,09152745 | 0,35956015 | NA         | 0,00022076 | NA          | 0,43622845 | NA          | 9  | -19002,919  | 38023,8479 | 187,43116  | 6,54E-28 |
| 1000 | -1,05409025 | 0,78157333 | 0,00543311  | 4,44E-05 | NA          | NA         | -0,11273577 | -2,9468992  | 0,4586198  | 0,01897353 | 0,00021429 | 0,00012376  | NA         | NA          | 11 | -19000,9402 | 38023,895  | 187,478302 | 6,39E-28 |
| 1909 | -0,84339357 | NA         | NA          | 4,07E-05 | NA          | 0,55505772 | -0,13640315 | -2,2103983  | 0,38500536 | NA         | 0,00022113 | 0,00018745  | 0,43806177 | NA          | 10 | -19002,0449 | 38024,102  | 187,685251 | 5,76E-28 |
| 3919 | -0,2131598  | NA         | -0,0015413  | 4,25E-05 | -0,00164139 | NA         | NA          | -1,71083893 | 0,37612338 | NA         | 0,00021703 | 0,00013898  | 0,46389079 | -0,13469622 | 11 | -19001,0858 | 38024,1862 | 187,769526 | 5,52E-28 |
| 1341 | 0,65451489  | NA         | NA          | 3,95E-05 | -0,00164357 | 0,48762971 | -0,22170047 | -1,96172815 | NA         | NA         | 0,00021146 | NA          | 0,48287384 | NA          | 9  | -19003,1489 | 38024,3077 | 187,890961 | 5,20E-28 |
| 3357 | -0,31227401 | NA         | NA          | 4,32E-05 | -0,00145314 | 0,47935513 | NA          | -1,4783871  | NA         | NA         | 0,00020739 | NA          | 0,51055393 | -0,13912561 | 9  | -19003,159  | 38024,3279 | 187,91116  | 5,14E-28 |
| 1399 | -0,50593593 | NA         | -0,00700816 | 4,14E-05 | NA          | 0,55021643 | -0,14061875 | -2,09152745 | 0,35956015 | NA         | 0,00022076 | NA          | 0,43622845 | NA          | 10 | -19002,2859 | 38024,584  | 187,769526 | 4,52E-28 |
| 1911 | -0,50593593 | NA         | -0,00700816 | 4,14E-05 | NA          | 0,55021643 | -0,14061875 | -2,2103983  | 0,38500536 | NA         | 0,00022113 | 0,00018745  | 0,43806177 | NA          | 11 | -19001,4118 | 38024,8383 | 188,421564 | 3,98E-28 |
| 454  | -1,235734   | 0,76857786 | NA          | 4,69E-05 | NA          | NA         | NA          | -2,87228819 | 0,44207022 | 0,01904584 | 0,00021405 | NA          | NA         | NA          | 8  | -19004,5745 | 38025,157  | 188,740285 | 3,40E-28 |
| 1391 | 0,74969745  | NA         | -0,00245756 | 3,91E-05 | -0,00181949 | NA         | -0,20513804 | -2,09152745 | 0,35956015 | NA         | 0,00022076 | NA          | 0,43622845 | NA          | 10 | -19002,5852 | 38025,1825 | 188,76579  | 3,35E-28 |
| 1903 | 0,74969745  | NA         | -0,00245756 | 3,91E-05 | -0,00181949 | NA         | -0,20513804 | -2,2103983  | 0,38500536 | NA         | 0,00022113 | 0,00018745  | 0,43806177 | NA          | 11 | -19001,7111 | 38025,4368 | 189,020103 | 2,95E-28 |
| 456  | -1,52051301 | 0,78035551 | 0,00624724  | 4,63E-05 | NA          | NA         | NA          | -2,87228819 | 0,44207022 | 0,01904584 | 0,00021405 | NA          | NA         | NA          | 9  | -19004,0984 | 38026,2068 | 189,790094 | 2,01E-28 |
| 3359 | -0,39160679 | NA         | 0,00183718  | 4,30E-05 | -0,00146197 | 0,48040455 | NA          | -1,4783871  | NA         | NA         | 0,00020739 | NA          | 0,51055393 | -0,13912561 | 10 | -19003,1156 | 38026,2433 | 189,826551 | 1,97E-28 |
| 1343 | 0,61699723  | NA         | 0,00084798  | 3,94E-05 | -0,00164748 | 0,4880593  | -0,22142621 | -1,96172815 | NA         | NA         | 0,00021146 | NA          | 0,48287384 | NA          | 10 | -19003,1396 | 38026,2913 | 189,874584 | 1,93E-28 |
| 966  | -1,235734   | 0,76857786 | NA          | 4,69E-05 | NA          | NA         | NA          | -2,9468992  | 0,4586198  | 0,01897353 | 0,00021429 | 0,00012376  | NA         | NA          | 9  | -19004,1991 | 38026,4082 | 189,991518 | 1,82E-28 |
| 2557 | 0,65451489  | NA         | NA          | 3,95E-05 | -0,00164357 | 0,48762971 | -0,22170047 | -2,55577604 | 0,44288659 | 0,01897716 | 0,00021141 | NA          | NA         | -0,08883356 | 11 | -19002,4255 | 38026,8657 | 190,448939 | 1,45E-28 |
| 968  | -1,52051301 | 0,78035551 | 0,00624724  | 4,63E-05 | NA          | NA         | NA          | -2,9468992  | 0,4586198  | 0,01897353 | 0,00021429 | 0,00012376  | NA         | NA          | 10 | -19003,7231 | 38027,4583 | 191,041548 | 1,08E-28 |
| 3069 | 0,65451489  | NA         | NA          | 3,95E-05 | -0,00164357 | 0,48762971 | -0,22170047 | -2,61719209 | 0,45517288 | 0,01892094 | 0,00021164 | 9,21E-05    | NA         | -0,08713002 | 12 | -19002,22   | 38028,4572 | 192,004525 | 6,52E-29 |
| 2559 | 0,61699723  | NA         | 0,00084798  | 3,94E-05 | -0,00164748 | 0,4880593  | -0,22142621 | -2,55577604 | 0,44288659 | 0,01897716 | 0,00021141 | NA          | NA         | -0,08883356 | 12 | -19002,4162 | 38028,8497 | 192,433006 | 5,36E-29 |
| 1365 | -1,36352414 | NA         | NA          | 4,29E-05 | NA          | 0,54467715 | NA          | -2,09152745 | 0,35956015 | NA         | 0,00022076 | NA          | 0,43622845 | NA          | 8  | -19006,4593 | 38028,9267 | 192,509929 | 5,16E-29 |
| 1877 | -1,36352414 | NA         | NA          | 4,29E-05 | NA          | 0,54467715 | NA          | -2,2103983  | 0,38500536 | NA         | 0,00022113 | 0,00018745  | 0,43806177 | NA          | 9  | -19005,5853 | 38029,1805 | 192,763798 | 4,54E-29 |
| 1367 | -1,08960867 | NA         | -0,00576757 | 4,36E-05 | NA          | 0,53973144 | NA          | -2,09152745 | 0,35956015 | NA         | 0          |             |            |             |    |             |            |            |          |

|      |             |            |             |          |             |            |             |             |            |            |            |             |            |             |    |             |            |              |          |
|------|-------------|------------|-------------|----------|-------------|------------|-------------|-------------|------------|------------|------------|-------------|------------|-------------|----|-------------|------------|--------------|----------|
| 1023 | 0,61699723  | NA         | 0,00084798  | 3,94E-05 | -0,00164748 | 0,4880593  | -0,22142621 | -2,9468992  | 0,4586198  | 0,01897353 | 0,00021429 | 0,00012376  | NA         | NA          | 12 | -19005,9951 | 38036,0075 | 199,590761   | 1,50E-30 |
| 1357 | -0,28011525 | NA         | NA          | 4,24E-05 | -0,0016491  | NA         | NA          | -2,09152745 | 0,35956015 | NA         | 0,00022076 | NA          | 0,43622845 | NA          | 8  | -19010,9511 | 38037,9101 | 201,493348   | 5,78E-32 |
| 366  | -0,14195779 | 0,65649184 | NA          | 4,36E-05 | -0,00074998 | NA         | -0,15445798 | -1,97841134 | 0,41538406 | NA         | 0,00021885 | NA          | NA         | NA          | 9  | -19010,0001 | 38038,0101 | 201,593406   | 5,50E-31 |
| 1869 | -0,28011525 | NA         | NA          | 4,24E-05 | -0,0016491  | NA         | NA          | -2,2103983  | 0,38500536 | NA         | 0,00022113 | 0,00018745  | 0,43806177 | NA          | 9  | -19010,077  | 38038,1639 | 201,747217   | 5,09E-32 |
| 368  | -0,45110821 | 0,66723944 | 0,00674107  | 4,29E-05 | -0,00076432 | NA         | -0,15224001 | -1,97841134 | 0,41538406 | NA         | 0,00021885 | NA          | NA         | NA          | 10 | -19009,4419 | 38038,896  | 202,479298   | 3,53E-31 |
| 1821 | -0,31227401 | NA         | NA          | 4,32E-05 | -0,00145314 | 0,47935513 | NA          | -1,78635429 | NA         | NA         | 0,0002119  | -0,00029974 | 0,47515083 | NA          | 9  | -19010,4468 | 38038,9036 | 202,486868   | 3,52E-31 |
| 878  | -0,14195779 | 0,65649184 | NA          | 4,36E-05 | -0,00074998 | NA         | -0,15445798 | -2,0661368  | 0,43415925 | NA         | 0,00021911 | 0,00013912  | NA         | NA          | 10 | -19009,5222 | 38039,0565 | 202,639755   | 3,26E-31 |
| 1359 | -0,2131598  | NA         | -0,0015413  | 4,25E-05 | -0,00164139 | NA         | NA          | -2,09152745 | 0,35956015 | NA         | 0,00022076 | NA          | 0,43622845 | NA          | 9  | -19010,9214 | 38039,8527 | 203,435951   | 2,19E-31 |
| 880  | -0,45110821 | 0,66723944 | 0,00674107  | 4,29E-05 | -0,00076432 | NA         | -0,15224001 | -2,0661368  | 0,43415925 | NA         | 0,00021911 | 0,00013912  | NA         | NA          | 11 | -19008,964  | 38039,9426 | 203,525869   | 2,09E-31 |
| 2382 | -0,8455927  | 0,67951403 | NA          | 4,64E-05 | -0,00057321 | NA         | NA          | -1,66433243 | 0,4162362  | NA         | 0,00021617 | NA          | NA         | -0,08904476 | 9  | -19011,0294 | 38040,0688 | 203,652087   | 1,96E-31 |
| 1871 | -0,2131598  | NA         | -0,0015413  | 4,25E-05 | -0,00164139 | NA         | NA          | -2,2103983  | 0,38500536 | NA         | 0,00022113 | 0,00018745  | 0,43806177 | NA          | 10 | -19010,0473 | 38040,1068 | 203,690042   | 1,93E-31 |
| 2384 | -1,17938783 | 0,69098467 | 0,00751019  | 4,56E-05 | -0,00059207 | NA         | NA          | -1,66433243 | 0,4162362  | NA         | 0,00021617 | NA          | NA         | -0,08904476 | 10 | -19010,3395 | 38040,6911 | 204,274401   | 1,44E-31 |
| 1823 | -0,39160679 | NA         | 0,00183718  | 4,30E-05 | -0,00146197 | 0,48040455 | NA          | -1,78635429 | NA         | NA         | 0,0002119  | -0,00029974 | 0,47515083 | NA          | 10 | -19010,4034 | 38040,819  | 204,402258   | 1,35E-31 |
| 2406 | -0,79586264 | 0,77122371 | NA          | 4,50E-05 | NA          | NA         | -0,11503973 | -1,66433243 | 0,4162362  | NA         | 0,00021617 | NA          | NA         | -0,08904476 | 9  | -19011,6031 | 38041,2162 | 204,799516   | 1,11E-31 |
| 2894 | -0,8455927  | 0,67951403 | NA          | 4,64E-05 | -0,00057321 | NA         | NA          | -1,73983563 | 0,43090563 | NA         | 0,00021643 | 0,00010896  | NA         | -0,08710954 | 10 | -19010,7397 | 38041,4916 | 205,074842   | 9,64E-32 |
| 1309 | -0,31227401 | NA         | NA          | 4,32E-05 | -0,00145314 | 0,47935513 | NA          | -1,96172815 | NA         | NA         | 0,00021146 | NA          | 0,48287384 | NA          | 8  | -19013,0517 | 38042,1114 | 205,694663   | 7,07E-32 |
| 2896 | -1,17938783 | 0,69098467 | 0,00751019  | 4,56E-05 | -0,00059207 | NA         | NA          | -1,73983563 | 0,43090563 | NA         | 0,00021643 | 0,00010896  | NA         | -0,08710954 | 11 | -19010,0497 | 38042,1141 | 205,697377   | 7,06E-33 |
| 2408 | -1,05409025 | 0,78157333 | 0,00543311  | 4,44E-05 | NA          | NA         | -0,11273577 | -1,66433243 | 0,4162362  | NA         | 0,00021617 | NA          | NA         | -0,08904476 | 10 | -19011,2429 | 38042,4979 | 206,081151   | 5,83E-32 |
| 2918 | -0,79586264 | 0,77122371 | NA          | 4,50E-05 | NA          | NA         | -0,11503973 | -1,73983563 | 0,43090563 | NA         | 0,00021643 | 0,00010896  | NA         | -0,08710954 | 10 | -19011,3134 | 38042,6399 | 206,22227    | 5,43E-32 |
| 2920 | -1,05409025 | 0,78157333 | 0,00543311  | 4,44E-05 | NA          | NA         | -0,11273577 | -1,73983563 | 0,43090563 | NA         | 0,00021643 | 0,00010896  | NA         | -0,08710954 | 11 | -19010,9531 | 38043,9208 | 207,504127   | 2,86E-32 |
| 1311 | -0,39160679 | NA         | 0,00183718  | 4,30E-05 | -0,00146197 | 0,48040455 | NA          | -1,96172815 | NA         | NA         | 0,00021146 | NA          | 0,48287384 | NA          | 9  | -19013,0083 | 38044,0266 | 207,609832   | 2,71E-32 |
| 2525 | -0,31227401 | NA         | NA          | 4,32E-05 | -0,00145314 | 0,47935513 | NA          | -2,55577604 | 0,44288659 | 0,01897716 | 0,00021141 | NA          | NA         | -0,08883356 | 10 | -19012,3284 | 38044,6689 | 208,252198   | 1,97E-32 |
| 2374 | -1,235734   | 0,76857786 | NA          | 4,69E-05 | NA          | NA         | NA          | -1,66433243 | 0,4162362  | NA         | 0,00021617 | NA          | NA         | -0,08904476 | 8  | -19014,5018 | 38045,0115 | 208,59481    | 1,66E-32 |
| 334  | -0,8455927  | 0,67951403 | NA          | 4,64E-05 | -0,00057321 | NA         | NA          | -1,97841134 | 0,41538406 | NA         | 0,00021885 | NA          | NA         | NA          | 8  | -19015,0206 | 38046,0491 | 209,63236    | 9,87E-33 |
| 2376 | -1,52051301 | 0,78035551 | 0,00624724  | 4,63E-05 | NA          | NA         | NA          | -1,66433243 | 0,4162362  | NA         | 0,00021617 | NA          | NA         | -0,08904476 | 9  | -19014,0257 | 38046,0613 | 209,644619   | 9,81E-33 |
| 3037 | -0,31227401 | NA         | NA          | 4,32E-05 | -0,00145314 | 0,47935513 | NA          | -2,61719209 | 0,45517288 | 0,01892094 | 0,00021164 | 9,21E-05    | NA         | -0,08713002 | 11 | -19012,1228 | 38046,2603 | 209,843563   | 8,89E-33 |
| 2886 | -1,235734   | 0,76857786 | NA          | 4,69E-05 | NA          | NA         | NA          | -1,73983563 | 0,43090563 | NA         | 0,00021643 | 0,00010896  | NA         | -0,08710954 | 9  | -19014,2121 | 38046,4341 | 210,017343   | 8,15E-33 |
| 2527 | -0,39160679 | NA         | 0,00183718  | 4,30E-05 | -0,00146197 | 0,48040455 | NA          | -2,55577604 | 0,44288659 | 0,01897716 | 0,00021141 | NA          | NA         | -0,08883356 | 11 | -19012,285  | 38046,5845 | 210,16781    | 7,56E-33 |
| 336  | -1,17938783 | 0,69098467 | 0,00751019  | 4,56E-05 | -0,00059207 | NA         | NA          | -1,97841134 | 0,41538406 | NA         | 0,00021885 | NA          | NA         | NA          | 9  | -19014,3306 | 38046,6712 | 210,254452   | 7,24E-33 |
| 846  | -0,8455927  | 0,67951403 | NA          | 4,64E-05 | -0,00057321 | NA         | NA          | -2,0661368  | 0,43415925 | NA         | 0,00021911 | 0,00013912  | NA         | NA          | 9  | -19014,5426 | 38047,0952 | 210,678488   | 5,85E-33 |
| 358  | -0,79586264 | 0,77122371 | NA          | 4,50E-05 | NA          | NA         | -0,11503973 | -1,97841134 | 0,41538406 | NA         | 0,00021885 | NA          | NA         | NA          | 8  | -19015,5943 | 38047,1965 | 210,779789   | 5,56E-33 |
| 2888 | -1,52051301 | 0,78035551 | 0,00624724  | 4,63E-05 | NA          | NA         | NA          | -1,73983563 | 0,43090563 | NA         | 0,00021643 | 0,00010896  | NA         | -0,08710954 | 10 | -19013,736  | 38047,4841 | 211,067373   | 4,82E-33 |
| 848  | -1,17938783 | 0,69098467 | 0,00751019  | 4,56E-05 | -0,00059207 | NA         | NA          | -2,0661368  | 0,43415925 | NA         | 0,00021911 | 0,00013912  | NA         | NA          | 10 | -19013,8527 | 38047,7175 | 211,300802   | 4,29E-33 |
| 3039 | -0,39160679 | NA         | 0,00183718  | 4,30E-05 | -0,00146197 | 0,48040455 | NA          | -2,61719209 | 0,45517288 | 0,01892094 | 0,00021164 | 9,21E-05    | NA         | -0,08713002 | 12 | -19012,0794 | 38048,1761 | 211,759397   | 3,41E-33 |
| 870  | -0,79586264 | 0,77122371 | NA          | 4,50E-05 | NA          | NA         | -0,11503973 | -2,0661368  | 0,43415925 | NA         | 0,00021911 | 0,00013912  | NA         | NA          | 9  | -19015,1163 | 38048,2426 | 211,825917   | 3,30E-33 |
| 4013 | 0,64576877  | NA         | NA          | 3,88E-05 | -0,00183092 | NA         | -0,20438761 | -2,05206432 | NA         | 0,01786019 | 0,00020271 | -0,00039168 | 0,51529109 | -0,14768431 | 11 | -19013,1642 | 38048,3431 | 211,926351   | 3,14E-33 |
| 360  | -1,05409025 | 0,78157333 | 0,00543311  | 4,44E-05 | NA          | NA         | -0,11273577 | -1,97841134 | 0,41538406 | NA         | 0,00021885 | NA          | NA         | NA          | 9  | -19015,234  | 38048,4779 | 212,061203   | 2,93E-33 |
| 4021 | -0,84339357 | NA         | NA          | 4,07E-05 | NA          | 0,55505772 | -0,13640315 | -2,05206432 | NA         | 0,01786019 | 0,00020271 | -0,00039168 | 0,51529109 | -0,14768431 | 11 | -19013,4225 | 38048,8595 | 212,442783   | 2,42E-34 |
| 872  | -1,05409025 | 0,78157333 | 0,00543311  | 4,44E-05 | NA          | NA         | -0,11273577 | -2,0661368  | 0,43415925 | NA         | 0,00021911 | 0,00013912  | NA         | NA          | 10 | -19014,7561 | 38049,5243 | 213,107552   | 1,74E-33 |
| 4023 | -0,50593593 | NA         | -0,00700816 | 4,14E-05 | NA          | 0,55021643 | -0,14061875 | -2,05206432 | NA         | 0,01786019 | 0,00020271 | -0,00039168 | 0,51529109 | -0,14768431 | 12 | -19012,7894 | 38049,596  | 213,179317   | 1,68E-34 |
| 4015 | 0,74969745  | NA         | -0,00245756 | 3,91E-05 | -0,00181949 | NA         | -0,20513804 | -2,05206432 | NA         | 0,01786019 | 0,00020271 | -0,00039168 | 0,51529109 | -0,14768431 | 12 | -19013,0887 | 38050,1946 | 213,777856   | 1,24E-33 |
| 477  | -0,31227401 | NA         | NA          | 4,32E-05 | -0,00145314 | 0,47935513 | NA          | -2,87228819 | 0,44207022 | 0,01904584 | 0,00021405 | NA          | NA         | NA          | 9  | -19016,2826 | 38050,5752 | 214,158499   | 1,03E-33 |
| 326  | -1,235734   | 0,76857786 | NA          | 4,69E-05 | NA          | NA         | NA          | -1,97841134 | 0,41538406 | NA         | 0,00021885 | NA          | NA         | NA          | 7  | -19018,4929 | 38050,992  | 214,575305   | 8,34E-34 |
| 989  | -0,31227401 | NA         | NA          | 4,32E-05 | -0,00145314 | 0,47935513 | NA          | -2,9468992  | 0,4586198  | 0,01897353 | 0,00021429 | 0,00012376  | NA         | NA          | 10 | -19015,9073 | 38051,8267 | 215,409954   | 5,49E-34 |
| 838  | -1,235734   | 0,76857786 | NA          | 4,69E-05 | NA          | NA         | NA          | -2,0661368  | 0,43415925 | NA         | 0,00021911 | 0,00013912  | NA         | NA          | 8  | -19018,015  | 38052,0379 | 215,621211   | 4,94E-34 |
| 328  | -1,52051301 | 0,78035551 | 0,00624724  | 4,63E-05 | NA          | NA         | NA          | -1,97841134 | 0,41538406 | NA         | 0,00021885 | NA          | NA         | NA          | 8  | -19018,0168 | 38052,0416 | 215,624892   | 4,93E-35 |
| 479  | -0,39160679 | NA         | 0,00183718  | 4,30E-05 | -0,00146197 | 0,48040455 | NA          | -2,87228819 | 0,44207022 | 0,01904584 | 0,00021405 | NA          | NA         | NA          | 10 | -19016,2392 | 38052,4906 | 216,07389    | 3,94E-36 |
| 2429 | 0,65451489  | NA         | NA          | 3,95E-05 | -0,00164357 | 0,48762971 | -0,22170047 | -1,66433243 | 0,4162362  | NA         | 0,00021617 | NA          | NA         | -0,08904476 | 10 | -19016,307  | 38052,6263 | 216,209544   | 3,68E-34 |
| 840  | -1,52051301 | 0,78035551 | 0,00624724  | 4,63E-05 | NA          | NA         | NA          | -2,0661368  | 0,43415925 | NA         | 0,00021911 | 0,00013912  | NA         | NA          | 9  | -19017,5389 | 38053,0877 | 216,67102    | 2,92E-34 |
| 3006 | -0,06671637 | 0,57575795 | NA          | 4,34E-05 | -0,00071955 | 0,41051829 | -0,17478186 | -1,91049389 | NA         | 0,01549989 | 0,00020133 | -0,00049532 | NA         | -0,09486783 | 12 | -19014,7524 | 38053,522  | 217,105241   | 2,35E-34 |
| 3008 | -0,47166397 | 0,58945108 | 0,00876766  | 4,25E-05 | -0,00073797 | 0,4135805  | -0,1717464  | -1,91049389 | NA         | 0,01549989 | 0,00020133 | -0,00049532 | NA         | -0,09486783 | 13 | -19013,7782 | 38053,5765 | 217,159741   | 2,29E-34 |
| 991  | -0,39160679 | NA         | 0,00183718  | 4,30E-05 | -0,00146197 | 0,48040455 | NA          | -2,9468992  | 0,4586198  | 0,01897353 | 0,00021429 | 0,00012376  | NA         | NA          | 11 | -19015,8638 | 38053,7423 | 217,325566</ |          |

|      |             |            |             |          |             |            |             |             |            |            |            |             |            |             |    |             |            |            |          |
|------|-------------|------------|-------------|----------|-------------|------------|-------------|-------------|------------|------------|------------|-------------|------------|-------------|----|-------------|------------|------------|----------|
| 381  | 0,65451489  | NA         | NA          | 3,95E-05 | -0,00164357 | 0,48762971 | -0,22170047 | -1,97841134 | 0,41538406 | NA         | 0,00021885 | NA          | NA         | NA          | 9  | -19020,2982 | 38058,6063 | 222,189596 | 1,85E-35 |
| 893  | 0,65451489  | NA         | NA          | 3,95E-05 | -0,00164357 | 0,48762971 | -0,22170047 | -2,0661368  | 0,43415925 | NA         | 0,00021911 | 0,00013912  | NA         | NA          | 10 | -19019,8202 | 38059,6527 | 223,235945 | 1,10E-35 |
| 383  | 0,61699723  | NA         | 0,00084798  | 3,94E-05 | -0,00164748 | 0,4880593  | -0,22142621 | -1,97841134 | 0,41538406 | NA         | 0,00021885 | NA          | NA         | NA          | 10 | -19020,2889 | 38060,5899 | 224,173219 | 6,87E-36 |
| 3477 | -1,36352414 | NA         | NA          | 4,29E-05 | NA          | 0,54467715 | NA          | -2,27275384 | NA         | 0,01711404 | 0,00020255 | NA          | 0,52288611 | -0,14000571 | 9  | -19021,3036 | 38060,6171 | 224,200333 | 6,78E-36 |
| 958  | -0,06671637 | 0,57575795 | NA          | 4,34E-05 | -0,00071955 | 0,41051829 | -0,17478186 | -2,26386687 | NA         | 0,01548996 | 0,00020413 | -0,00046266 | NA         | NA          | 11 | -19019,3499 | 38060,7144 | 224,297727 | 6,46E-37 |
| 960  | -0,47166397 | 0,58945108 | 0,00876766  | 4,25E-05 | -0,00073797 | 0,4135805  | -0,1717464  | -2,26386687 | NA         | 0,01548996 | 0,00020413 | -0,00046266 | NA         | NA          | 12 | -19018,3757 | 38060,7687 | 224,352006 | 6,28E-36 |
| 895  | 0,61699723  | NA         | 0,00084798  | 3,94E-05 | -0,00164748 | 0,4880593  | -0,22142621 | -2,0661368  | 0,43415925 | NA         | 0,00021911 | 0,00013912  | NA         | NA          | 11 | -19019,811  | 38061,6365 | 225,21979  | 4,07E-36 |
| 3479 | -1,08960867 | NA         | -0,00576757 | 4,36E-05 | NA          | 0,53973144 | NA          | -2,27275384 | NA         | 0,01711404 | 0,00020255 | NA          | 0,52288611 | -0,14000571 | 10 | -19020,8713 | 38061,7547 | 225,337968 | 3,84E-36 |
| 2998 | -0,67953035 | 0,68234123 | NA          | 4,46E-05 | NA          | 0,41541375 | -0,13795142 | -1,91049389 | NA         | 0,01549989 | 0,00020133 | -0,00049532 | NA         | -0,09486783 | 11 | -19019,939  | 38061,8925 | 225,475811 | 3,58E-36 |
| 3559 | -0,65771633 | NA         | -0,01187559 | 4,14E-05 | NA          | NA         | -0,10732692 | -2,59012234 | 0,38593256 | 0,02081194 | 0,00021148 | NA          | 0,47514204 | -0,138389   | 11 | -19020,1711 | 38062,3567 | 225,939996 | 2,84E-36 |
| 3000 | -1,04079715 | 0,69637088 | 0,00755047  | 4,39E-05 | NA          | 0,41816409 | -0,13461471 | -1,91049389 | NA         | 0,01549989 | 0,00020133 | -0,00049532 | NA         | -0,09486783 | 12 | -19019,2197 | 38062,4567 | 226,039975 | 2,70E-38 |
| 3981 | -0,28011525 | NA         | NA          | 4,24E-05 | -0,0016491  | NA         | NA          | -2,05206432 | NA         | 0,01786019 | 0,00020271 | -0,00039168 | 0,51529109 | -0,14768431 | 10 | -19021,4545 | 38062,9212 | 226,504528 | 2,14E-36 |
| 4071 | -0,65771633 | NA         | -0,01187559 | 4,14E-05 | NA          | NA         | -0,10732692 | -2,66976045 | 0,40191971 | 0,02073197 | 0,0002118  | 0,00011864  | 0,47565984 | -0,13600353 | 12 | -19019,8291 | 38063,6754 | 227,25865  | 1,47E-37 |
| 3557 | -1,22822825 | NA         | NA          | 4,02E-05 | NA          | NA         | -0,09995451 | -2,59012234 | 0,38593256 | 0,02081194 | 0,00021148 | NA          | 0,47514204 | -0,138389   | 10 | -19021,9155 | 38063,8432 | 227,426456 | 1,35E-36 |
| 2976 | -1,28042467 | 0,61751101 | 0,00965662  | 4,55E-05 | -0,00054807 | 0,40424516 | NA          | -1,91049389 | NA         | 0,01549989 | 0,00020133 | -0,00049532 | NA         | -0,09486783 | 12 | -19020,0244 | 38064,066  | 227,649306 | 1,21E-36 |
| 2974 | -0,85074914 | 0,60334436 | NA          | 4,65E-05 | -0,00052401 | 0,40049867 | NA          | -1,91049389 | NA         | 0,01549989 | 0,00020133 | -0,00049532 | NA         | -0,09486783 | 11 | -19021,2002 | 38064,415  | 227,99832  | 1,01E-36 |
| 3527 | -1,14142692 | NA         | -0,01089562 | 4,31E-05 | NA          | NA         | NA          | -2,59012234 | 0,38593256 | 0,02081194 | 0,00021148 | NA          | 0,47514204 | -0,138389   | 10 | -19022,2852 | 38064,5825 | 228,165764 | 9,33E-37 |
| 3983 | -0,2131598  | NA         | -0,0015413  | 4,25E-05 | -0,00164139 | NA         | NA          | -2,05206432 | NA         | 0,01786019 | 0,00020271 | -0,00039168 | 0,51529109 | -0,14768431 | 11 | -19021,4248 | 38064,8643 | 228,447574 | 8,11E-37 |
| 4069 | -1,22822825 | NA         | NA          | 4,02E-05 | NA          | NA         | -0,09995451 | -2,66976045 | 0,40191971 | 0,02073197 | 0,0002118  | 0,00011864  | 0,47565984 | -0,13600353 | 11 | -19021,5735 | 38065,1616 | 228,744888 | 6,99E-38 |
| 2494 | -0,06671637 | 0,57575795 | NA          | 4,34E-05 | -0,00071955 | 0,41051829 | -0,17478186 | -2,18775169 | NA         | 0,01458917 | 0,00020109 | NA          | NA         | -0,08533198 | 11 | -19021,6133 | 38065,2412 | 228,824483 | 6,71E-38 |
| 2496 | -0,47166397 | 0,58945108 | 0,00876766  | 4,25E-05 | -0,00073797 | 0,4135805  | -0,1717464  | -2,18775169 | NA         | 0,01458917 | 0,00020109 | NA          | NA         | -0,08533198 | 12 | -19020,6391 | 38065,2955 | 228,878761 | 6,53E-37 |
| 3525 | -1,63084607 | NA         | NA          | 4,18E-05 | NA          | NA         | NA          | -2,59012234 | 0,38593256 | 0,02081194 | 0,00021148 | NA          | 0,47514204 | -0,138389   | 9  | -19023,7603 | 38065,5306 | 229,113912 | 5,81E-37 |
| 4039 | -1,14142692 | NA         | -0,01089562 | 4,31E-05 | NA          | NA         | NA          | -2,66976045 | 0,40191971 | 0,02073197 | 0,0002118  | 0,00011864  | 0,47565984 | -0,13600353 | 11 | -19021,9432 | 38065,9009 | 229,484196 | 4,83E-37 |
| 4037 | -1,63084607 | NA         | NA          | 4,18E-05 | NA          | NA         | NA          | -2,66976045 | 0,40191971 | 0,02073197 | 0,0002118  | 0,00011864  | 0,47565984 | -0,13600353 | 10 | -19023,4183 | 38066,8488 | 230,432123 | 3,01E-37 |
| 1965 | 0,64576877  | NA         | NA          | 3,88E-05 | -0,00183092 | NA         | -0,20438761 | -2,58652225 | NA         | 0,01772679 | 0,00020696 | -0,00034396 | 0,48679163 | NA          | 10 | -19024,11   | 38068,2322 | 231,815457 | 1,50E-37 |
| 2966 | -1,1987332  | 0,68175498 | NA          | 4,69E-05 | NA          | 0,40581671 | NA          | -1,91049389 | NA         | 0,01549989 | 0,00020133 | -0,00049532 | NA         | -0,09486783 | 10 | -19024,1141 | 38068,2404 | 231,823643 | 1,50E-40 |
| 2968 | -1,59179834 | 0,69737855 | 0,00852736  | 4,60E-05 | NA          | 0,40932129 | NA          | -1,91049389 | NA         | 0,01549989 | 0,00020133 | -0,00049532 | NA         | -0,09486783 | 11 | -19023,1977 | 38068,41   | 231,993235 | 1,38E-37 |
| 1973 | -0,84339357 | NA         | NA          | 4,07E-05 | NA          | 0,55505772 | -0,13640315 | -2,58652225 | NA         | 0,01772679 | 0,00020696 | -0,00034396 | 0,48679163 | NA          | 10 | -19024,3682 | 38068,7486 | 232,33189  | 1,16E-37 |
| 950  | -0,67953035 | 0,68234123 | NA          | 4,46E-05 | NA          | 0,41541375 | -0,13795142 | -2,26386687 | NA         | 0,01548996 | 0,00020413 | -0,00046266 | NA         | NA          | 10 | -19024,5365 | 38069,0852 | 232,668519 | 9,82E-38 |
| 1975 | -0,50593593 | NA         | -0,00700816 | 4,14E-05 | NA          | 0,55021643 | -0,14061875 | -2,58652225 | NA         | 0,01772679 | 0,00020696 | -0,00034396 | 0,48679163 | NA          | 11 | -19023,7352 | 38069,4849 | 233,068202 | 8,04E-38 |
| 3469 | -0,28011525 | NA         | NA          | 4,24E-05 | -0,0016491  | NA         | NA          | -2,27275384 | NA         | 0,01711404 | 0,00020255 | NA          | 0,52288611 | -0,14000571 | 9  | -19025,7953 | 38069,6005 | 233,183753 | 7,59E-38 |
| 952  | -1,04079715 | 0,69637088 | 0,00755047  | 4,39E-05 | NA          | 0,41816409 | -0,13461471 | -2,26386687 | NA         | 0,01548996 | 0,00020413 | -0,00046266 | NA         | NA          | 11 | -19023,8173 | 38069,6492 | 233,232462 | 7,41E-38 |
| 2878 | -0,06671637 | 0,57575795 | NA          | 4,34E-05 | -0,00071955 | 0,41051829 | -0,17478186 | -1,2176888  | NA         | NA         | 0,00020569 | -0,00045432 | NA         | -0,0941422  | 11 | -19024,0221 | 38070,0589 | 233,642152 | 6,04E-38 |
| 1967 | 0,74969745  | NA         | -0,00245756 | 3,91E-05 | -0,00181949 | NA         | -0,20513804 | -2,58652225 | NA         | 0,01772679 | 0,00020696 | -0,00034396 | 0,48679163 | NA          | 11 | -19024,0344 | 38070,0835 | 233,666742 | 5,96E-40 |
| 2880 | -0,47166397 | 0,58945108 | 0,00876766  | 4,25E-05 | -0,00073797 | 0,4135805  | -0,1717464  | -1,2176888  | NA         | NA         | 0,00020569 | -0,00045432 | NA         | -0,0941422  | 12 | -19023,0479 | 38070,1132 | 233,696431 | 5,88E-38 |
| 2397 | -0,31227401 | NA         | NA          | 4,32E-05 | -0,00145314 | 0,47935513 | NA          | -1,66433243 | 0,4162362  | NA         | 0,00021617 | NA          | NA         | -0,08904476 | 9  | -19026,2099 | 38070,4297 | 234,013025 | 5,02E-39 |
| 446  | -0,06671637 | 0,57575795 | NA          | 4,34E-05 | -0,00071955 | 0,41051829 | -0,17478186 | -2,49206855 | NA         | 0,01465098 | 0,00020366 | NA          | NA         | NA          | 10 | -19025,4032 | 38070,8187 | 234,401943 | 4,13E-38 |
| 448  | -0,47166397 | 0,58945108 | 0,00876766  | 4,25E-05 | -0,00073797 | 0,4135805  | -0,1717464  | -2,49206855 | NA         | 0,01465098 | 0,00020366 | NA          | NA         | NA          | 11 | -19024,4291 | 38070,8727 | 234,456001 | 4,02E-38 |
| 3885 | 0,64576877  | NA         | NA          | 3,88E-05 | -0,00183092 | NA         | -0,20438761 | -1,25486087 | NA         | NA         | 0,00020772 | -0,0003441  | 0,50313521 | -0,14558566 | 10 | -19025,467  | 38070,9462 | 234,529472 | 3,87E-38 |
| 928  | -1,28042467 | 0,61751101 | 0,00965662  | 4,55E-05 | -0,00054807 | 0,40424516 | NA          | -2,26386687 | NA         | 0,01548996 | 0,00020413 | -0,00046266 | NA         | NA          | 11 | -19024,622  | 38071,2585 | 234,841792 | 3,31E-38 |
| 3893 | -0,84339357 | NA         | NA          | 4,07E-05 | NA          | 0,55505772 | -0,13640315 | -1,25486087 | NA         | NA         | 0,00020772 | -0,0003441  | 0,50313521 | -0,14558566 | 10 | -19025,7252 | 38071,4626 | 235,045905 | 2,99E-38 |
| 3471 | -0,2131598  | NA         | -0,0015413  | 4,25E-05 | -0,00164139 | NA         | NA          | -2,27275384 | NA         | 0,01711404 | 0,00020255 | NA          | 0,52288611 | -0,14000571 | 10 | -19025,7656 | 38071,5433 | 235,126577 | 2,87E-38 |
| 926  | -0,85074914 | 0,60334436 | NA          | 4,65E-05 | -0,00052401 | 0,40049867 | NA          | -2,26386687 | NA         | 0,01548996 | 0,00020413 | -0,00046266 | NA         | NA          | 10 | -19025,7978 | 38071,6078 | 235,191028 | 2,78E-38 |
| 2909 | -0,31227401 | NA         | NA          | 4,32E-05 | -0,00145314 | 0,47935513 | NA          | -1,73983563 | 0,43090563 | NA         | 0,00021643 | 0,00010896  | NA         | -0,08710954 | 10 | -19025,9202 | 38071,8525 | 235,435779 | 2,46E-38 |
| 3895 | -0,50593593 | NA         | -0,00700816 | 4,14E-05 | NA          | 0,55021643 | -0,14061875 | -1,25486087 | NA         | NA         | 0,00020772 | -0,0003441  | 0,50313521 | -0,14558566 | 11 | -19025,0922 | 38072,1989 | 235,782217 | 2,07E-38 |
| 2399 | -0,39160679 | NA         | 0,00183718  | 4,30E-05 | -0,00146197 | 0,48040455 | NA          | -1,66433243 | 0,4162362  | NA         | 0,00021617 | NA          | NA         | -0,08904476 | 10 | -19026,1665 | 38072,3451 | 235,928415 | 1,92E-39 |
| 3887 | 0,74969745  | NA         | -0,00245756 | 3,91E-05 | -0,00181949 | NA         | -0,20513804 | -1,25486087 | NA         | NA         | 0,00020772 | -0,0003441  | 0,50313521 | -0,14558566 | 11 | -19025,3914 | 38072,7975 | 236,380757 | 1,54E-38 |
| 1453 | 0,64576877  | NA         | NA          | 3,88E-05 | -0,00183092 | NA         | -0,20438761 | -2,75826159 | NA         | 0,01709531 | 0,00020664 | NA          | 0,4949792  | NA          | 9  | -19027,4985 | 38073,0069 | 236,590158 | 1,38E-38 |
| 1461 | -0,84339357 | NA         | NA          | 4,07E-05 | NA          | 0,55505772 | -0,13640315 | -2,75826159 | NA         | 0,01709531 | 0,00020664 | NA          | 0,4949792  | NA          | 9  | -19027,7567 | 38073,5233 | 237,106591 | 1,07E-38 |
| 2486 | -0,67953035 | 0,68234123 | NA          | 4,46E-05 | NA          | 0,41541375 | -0,13795142 | -2,18775169 | NA         | 0,01458917 | 0,00020109 | NA          | NA         | -0,08533198 | 10 | -19026,7999 | 38073,612  | 237,195274 | 1,02E-38 |
| 2911 | -0,39160679 | NA         | 0,00183718  | 4,30E-05 | -0,00146197 | 0,48040455 | NA          | -1,73983563 | 0,43090563 |            |            |             |            |             |    |             |            |            |          |

















































































































[illegible]

|     |             |            |            |    |             |            |    |             |             |    |    |             |    |    |   |             |            |            |   |
|-----|-------------|------------|------------|----|-------------|------------|----|-------------|-------------|----|----|-------------|----|----|---|-------------|------------|------------|---|
| 9   | -6,18359995 | NA         | NA         | NA | -0,00186372 | NA         | NA | -0,99369134 | NA          | NA | NA | NA          | NA | NA | 4 | -21275,3011 | 42558,6044 | 4722,18766 | 0 |
| 2   | -10,126072  | 0,56333515 | NA         | NA | NA          | NA         | NA | -0,99369134 | NA          | NA | NA | NA          | NA | NA | 4 | -21276,0535 | 42560,1093 | 4723,69256 | 0 |
| 579 | -11,7728913 | NA         | 0,04392487 | NA | NA          | NA         | NA | -0,66565225 | -0,15004816 | NA | NA | -0,00048657 | NA | NA | 6 | -21281,1816 | 42574,3679 | 4737,9512  | 0 |
| 593 | -9,09446706 | NA         | NA         | NA | NA          | 0,38722306 | NA | -0,66565225 | -0,15004816 | NA | NA | -0,00048657 | NA | NA | 6 | -21286,315  | 42584,6347 | 4748,21799 | 0 |
| 515 | -11,7728913 | NA         | 0,04392487 | NA | NA          | NA         | NA | -0,82885018 | NA          | NA | NA | -0,0002841  | NA | NA | 5 | -21288,1926 | 42586,3885 | 4749,97175 | 0 |
| 67  | -11,7728913 | NA         | 0,04392487 | NA | NA          | NA         | NA | -0,96744453 | -0,08610767 | NA | NA | NA          | NA | NA | 5 | -21288,4626 | 42586,9285 | 4750,51175 | 0 |
| 3   | -11,7728913 | NA         | 0,04392487 | NA | NA          | NA         | NA | -0,99369134 | NA          | NA | NA | NA          | NA | NA | 4 | -21291,256  | 42590,5143 | 4754,09756 | 0 |
| 529 | -9,09446706 | NA         | NA         | NA | NA          | 0,38722306 | NA | -0,82885018 | NA          | NA | NA | -0,0002841  | NA | NA | 5 | -21293,326  | 42596,6553 | 4760,23854 | 0 |
| 81  | -9,09446706 | NA         | NA         | NA | NA          | 0,38722306 | NA | -0,96744453 | -0,08610767 | NA | NA | NA          | NA | NA | 5 | -21293,596  | 42597,1953 | 4760,77855 | 0 |
| 17  | -9,09446706 | NA         | NA         | NA | NA          | 0,38722306 | NA | -0,99369134 | NA          | NA | NA | NA          | NA | NA | 4 | -21296,3894 | 42600,7811 | 4764,36435 | 0 |
| 577 | -15,360872  | NA         | NA         | NA | NA          | NA         | NA | -0,66565225 | -0,15004816 | NA | NA | -0,00048657 | NA | NA | 5 | -21305,4572 | 42620,9177 | 4784,50094 | 0 |
| 513 | -15,360872  | NA         | NA         | NA | NA          | NA         | NA | -0,82885018 | NA          | NA | NA | -0,0002841  | NA | NA | 4 | -21312,4681 | 42632,9384 | 4796,52171 | 0 |
| 65  | -15,360872  | NA         | NA         | NA | NA          | NA         | NA | -0,96744453 | -0,08610767 | NA | NA | NA          | NA | NA | 4 | -21312,7381 | 42633,4784 | 4797,06172 | 0 |
| 1   | -15,360872  | NA         | NA         | NA | NA          | NA         | NA | -0,99369134 | NA          | NA | NA | NA          | NA | NA | 3 | -21315,5316 | 42637,0645 | 4800,64774 | 0 |
